# Supplementary material
Source: PubMed Central journal article supplement (PMC5448238)
Supplement: mmc1.pdf [file mmc1.pdf]

**Biophysical Journal, Volume 112**

**Supplemental Information**

**Specificity-Determining DNA Triplet Code for Positioning of Human  
Preinitiation Complex**

**Matan Goldshtein and David B. Lukatsky**

## Supporting Material

### Supporting Figures

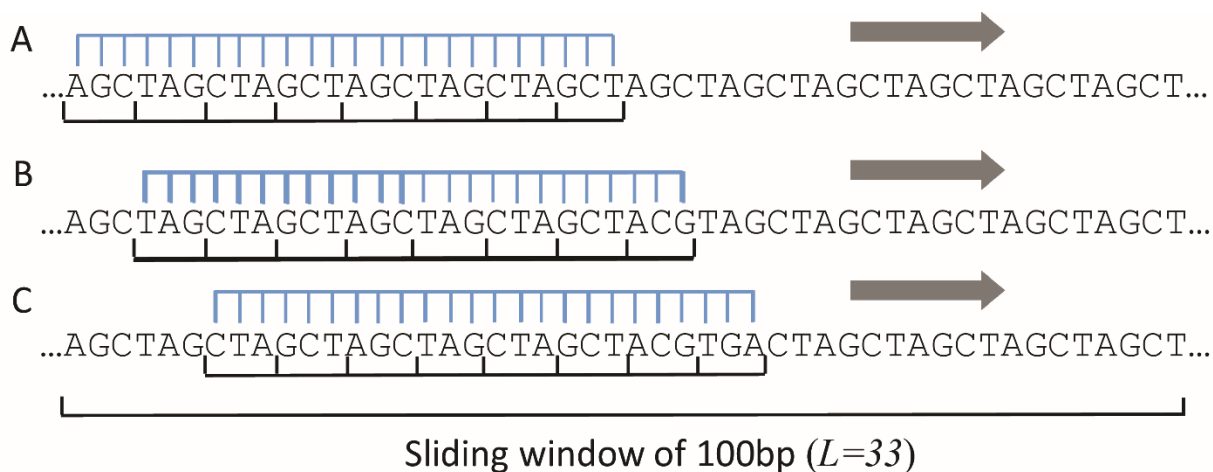

**FIGURE S1** Cartoon illustrating the calculation of the nonconsensus protein-DNA binding energies,  $U$ , as a model random binder slides along the sliding window. The interaction contacts of a model protein TF with all DNA nucleotide bases are depicted in blue. The corresponding nucleotide triplets are depicted in black below the DNA strand. In our model we used TF that forms 24 contacts with nucleotide bases (blue), which corresponds to  $M=8$  contacts with nucleotide triplets (black). Each model TF slides (gray arrow) along the DNA sequence by 3 bp steps. We used the sliding window with the width 100 bp, which corresponds to  $L=33$  nucleotide triplets. The following three examples illustrate the energy calculation as TF slides three consecutive steps along the sliding window: (A)  $U(1)=2K_{AGC}+2K_{TAG}+2K_{CTA}+2K_{GCT}$ ; (B)  $U(2)=2K_{TAG}+2K_{CTA}+2K_{GCT}+K_{AGC}+K_{ACG}$ ; (C)  $U(3)=2K_{CTA}+2K_{GCT}+K_{AGC}+K_{ACG}+K_{TAG}+K_{TGA}$ . The 64 random energy parameters  $K_{\alpha}$  are drawn from the Gaussian distribution with the zero mean and the standard deviation  $\sigma=2k_{\text{B}}T$ . These parameters uniquely define a given random binder. In all our calculations we used the free energy averaged over 250 random binders. Therefore, for each DNA sliding window, the procedure described above was repeated for all 250 random binders, each characterized by a different set of  $K_{\alpha}$ .

A

First reading frame

...AGCTAGCTAGCTAGCTAGCTAGCTAGCTAGCTAGCT...

Second reading frame

...AGCTAGCTAGCTAGCTAGCTAGCTAGCTAGCTAGCT...

Third reading frame

...AGCTAGCTAGCTAGCTAGCTAGCTAGCTAGCTAGCT...

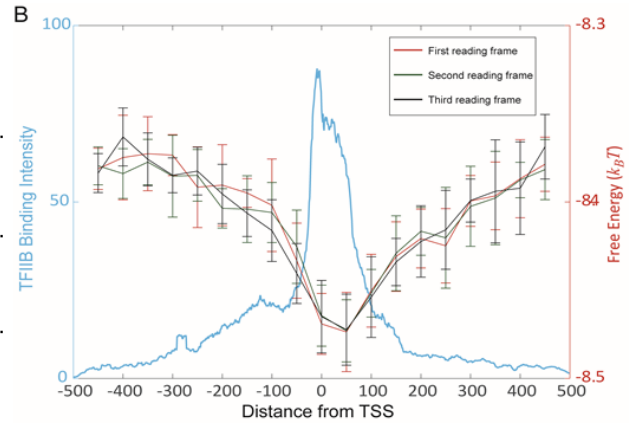

**FIGURE S2 Robustness of the nonconsensus protein-DNA binding free energy landscape computed for different DNA reading frames.** This figure is complementary to Fig. 1 of the main text, and all the definitions and the axes labels are identical to those defined in Fig. 1. (A) Three possible DNA reading frames for a sliding random binder are illustrated. (B) The average free energy of nonconsensus TFIIB-DNA binding for all three possible DNA reading frames, and the measured profile of average TFIIB occupancy around the TSSs of 6097 genes. For each reading frame, the average free energy was calculated every 50 bp, within the interval (-450 bp; 450 bp). The rest of the parameters are identical to those defined in Fig. 1 of the main text.

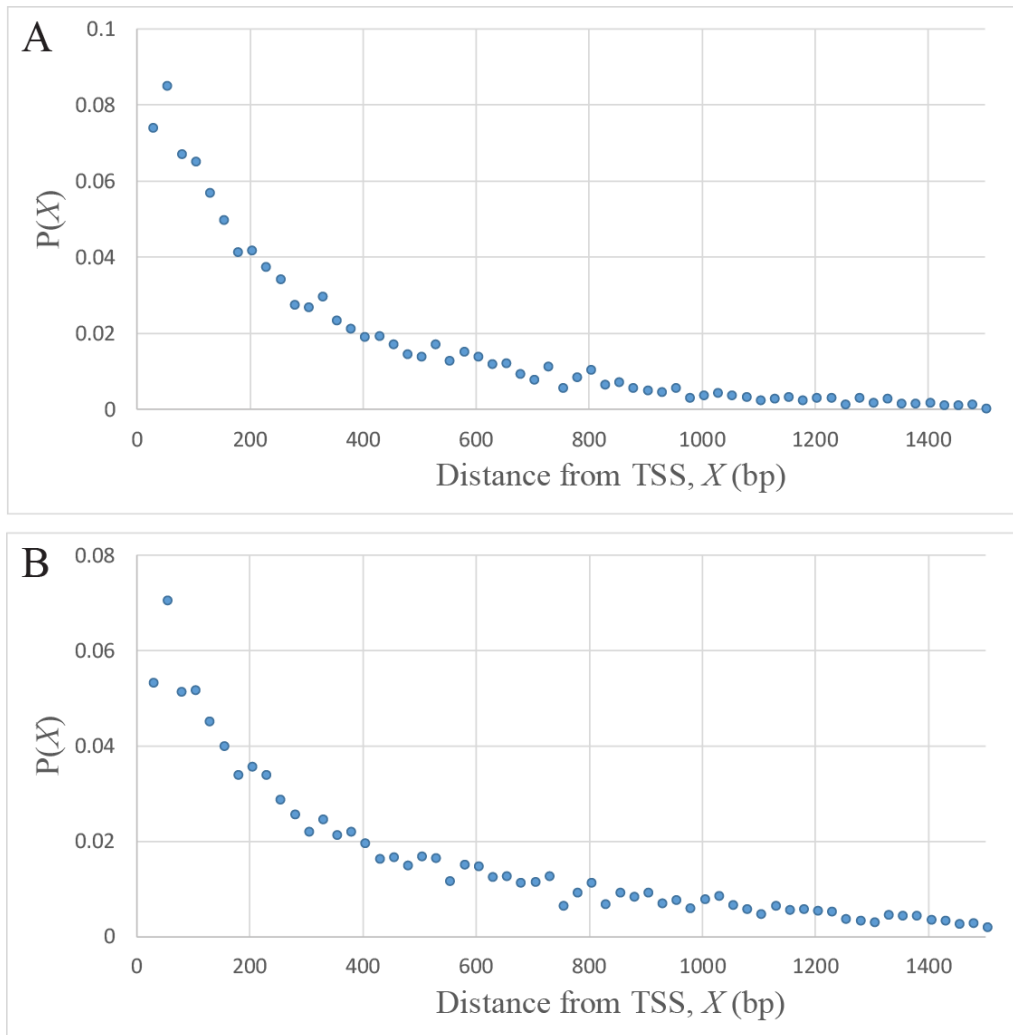

**FIGURE S3 Probability distribution of the Kozak translation start site consensus sequence as a function of the distance  $X$  after TSS for 6097 genes used in our analysis.** The Kozak sequence is the consensus sequence recognized by ribosomes to begin translation, gccRccATGG, where R represents a purine (i.e. A or G), and lower-case letters represent a lower significance parts of the consensus motif (M. Kozak, Nucl. Acid Res. 15(20), 8185 (1987)). (A) Probability distribution for the consensus sequence ATGG: 29% of the data falls within the first 100bp after the transcription start site (TSS); (B) Probability distribution for the consensus sequence RnnATGG: 22% of the data falls within the first 100bp after TSS.

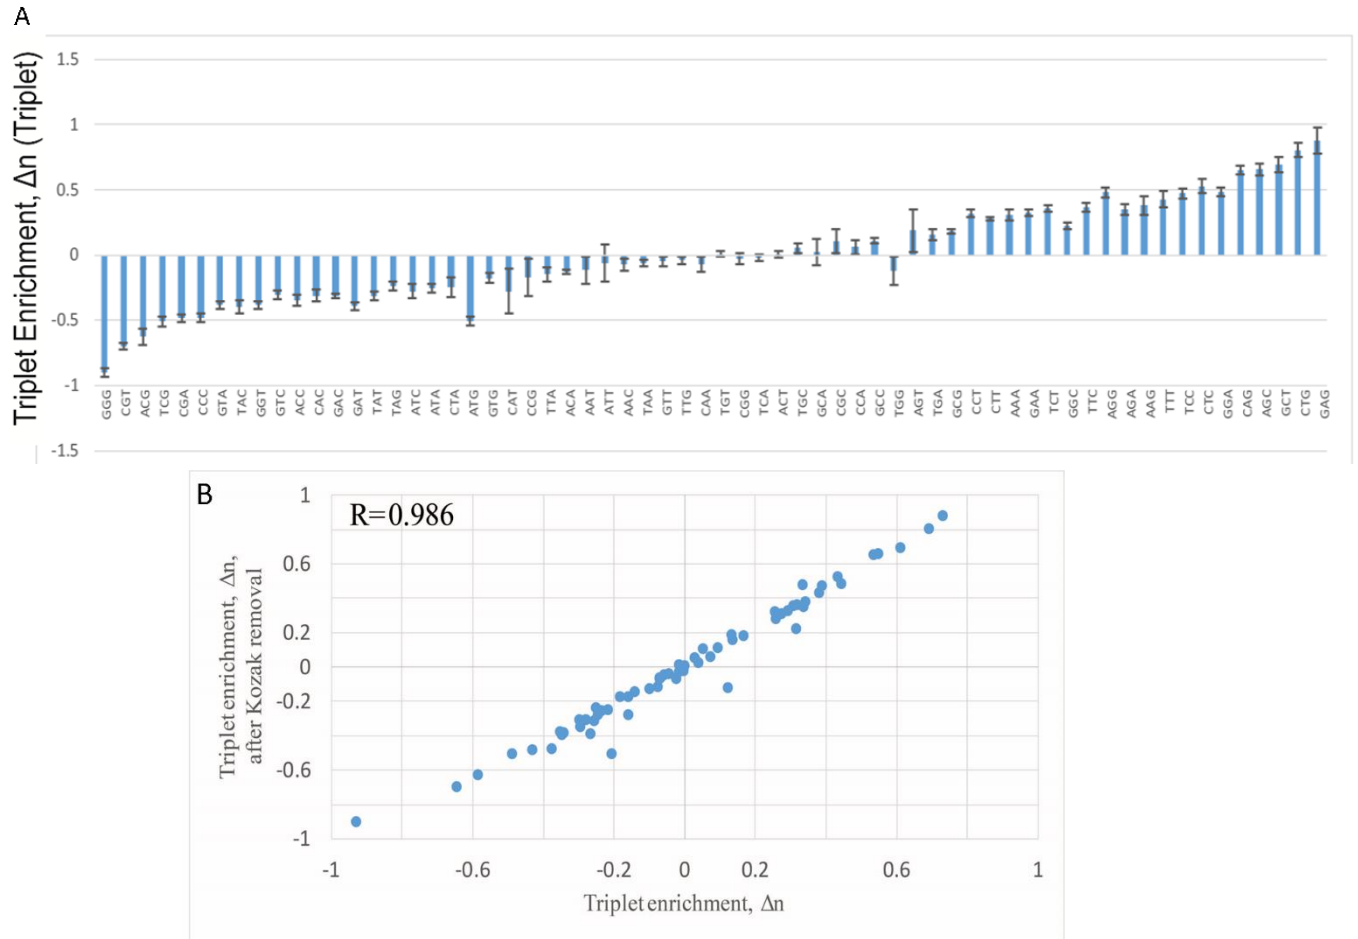

**FIGURE S4 Enrichment levels of 64 nucleotide triplets computed for the genomic regions characterized by high TFIIB binding intensity, after removal of sequences with Kozak translation start site consensus sequence.** (A) This figure is complementary to Fig. 2A of the main text. After removing DNA sequences containing the Kozak translation start site (see Fig. S3A), we are left with 4360 sequences (out of 6097 sequences used in Fig. 2A of the main text). The definition of the triplet enrichment  $\Delta n$  is identical to the one used in Fig. 2 of the main text. (B) The plot containing 64 points, representing the linear correlation between the triplet enrichment  $\Delta n$  with and without removing the Kozak sequences, respectively.

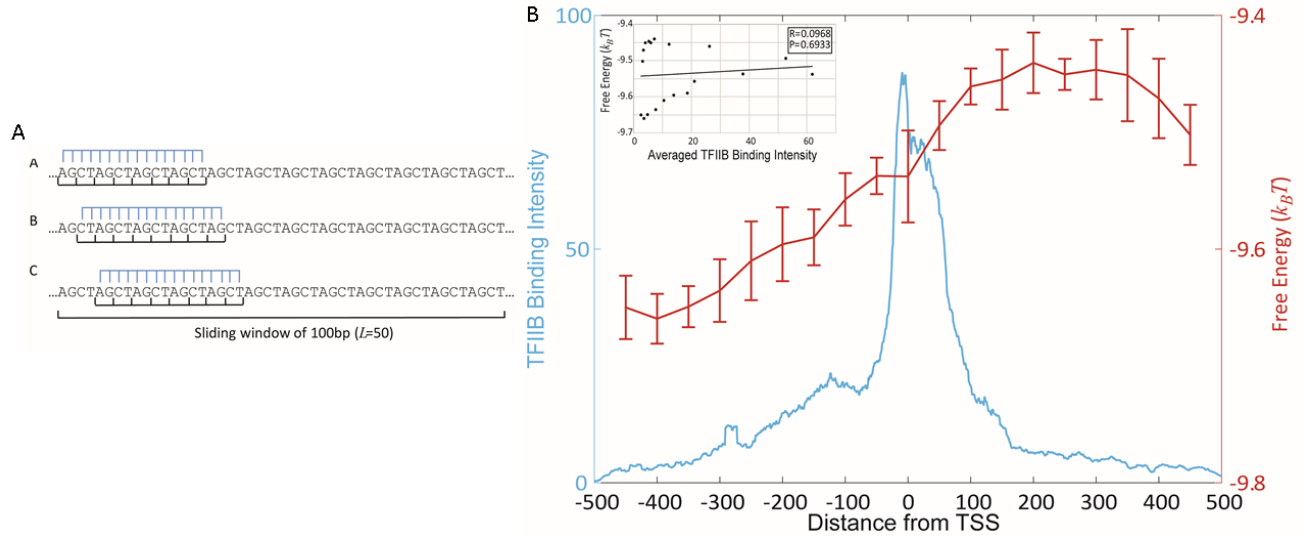

**FIGURE S5 Free energy of nonconsensus TFIIB-DNA binding based on doublets does not correlate with the TFIIB binding intensity.** The computed average free energy of nonconsensus TFIIB-DNA binding (using the model random binding interaction potential with all 16 possible nucleotide doublets) and the profile of the average TFIIB binding intensity measured around the TSSs of 6097 genes (see Fig. 1 of the main text). In order to compute the free energy, we used Eqs. (1-3), as described in the main text, with the index  $\alpha$  running over 16 possible nucleotide doublets (instead of 64 possible triplets used in the main text in order to compute the free energy). (A) Cartoon illustrating the calculation of the nonconsensus protein-DNA binding energies,  $U$ , as a model random binder slides along the sliding window for doublets. For example, the model protein-DNA binding energy for the first, top position,  $U(1)=4K_{AG}+4K_{CT}$ . Here all 16 possible energy parameters (for each model TF),  $K_\alpha$ , are drawn from the Gaussian distribution with the zero mean and the standard deviation,  $\sigma=2k_B T$ . (B) The average free energy was calculated every 50 bp, within the interval (-450 bp; 450 bp). In order to compute the free energy, we used a sliding window of 100 bp. To compute error bars, we calculated the mean free energy for each chromosome and divided the results into five randomly chosen subgroups and computed the mean for each subgroup. The error bars are defined as one standard deviation of mean free energy between the subgroups. (Inset) The correlation between the free energy and the TFIIB binding intensity with the Pearson correlation coefficient and the  $p$ -value.

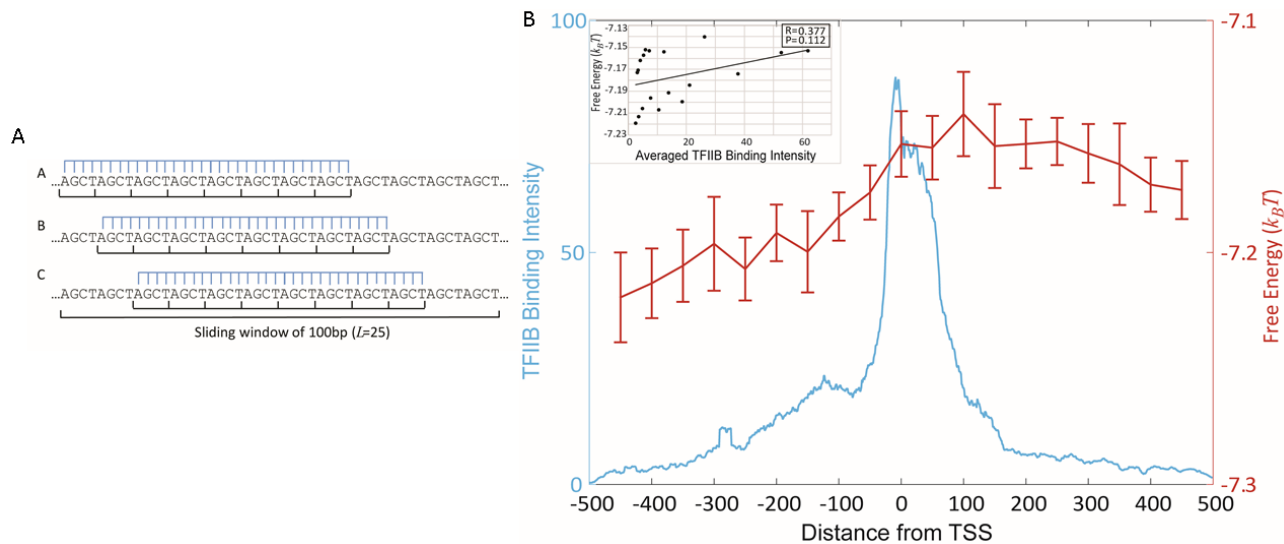

**FIGURE S6 Free energy of nonconsensus TFIIB-DNA binding based on quadruplets does not correlate with the TFIIB binding intensity.** The computed average free energy of nonconsensus TFIIB-DNA binding (using the model random binding interaction potential with all 256 possible nucleotide quadruplets) and the profile of the average TFIIB binding intensity measured around 6097 genes (see Fig. 1 of the main text). In order to compute the free energy, we used Eqs. (1-3), as described in the main text, with the index  $\alpha$  running over 256 possible nucleotide quadruplets (instead of 64 possible triplets used in the main text). (A) Cartoon illustrating the calculation of the nonconsensus protein-DNA binding energies,  $U$ , as a model random binder slides along the sliding window for doublets. For example, the model protein-DNA binding energy for the first, top position,  $U(1)=8K_{AGCT}$ . Here all 256 possible energy parameters (for each model TF),  $K_\alpha$ , are drawn from the Gaussian distribution with the zero mean and the standard deviation,  $\sigma=2k_B T$ . (B) The average free energy was calculated every 50 bp, within the interval (-450 bp; 450 bp). In order to compute the free energy, we used a sliding window of 100 bp. To compute error bars, we calculated the mean free energy for each chromosome and divided the results into five randomly chosen subgroups and computed the mean for each subgroup. The error bars are defined as one standard deviation of mean free energy between the subgroups. (Inset) The correlation between the free energy and the TFIIB binding intensity with the Pearson correlation coefficient and the  $p$ -value.

### Supporting Tables

|     | Mean [0;100] | Mean [0;100] Rand | KS-test | P-Value   | $\Delta$ (Mean [0;100]-Mean [0;100] rand) | Mean [-450;-350] | Mean [-450;-350] Rand | KS-test | P-Value  | $\Delta$ (Mean [-450;-350]-Mean[-450;-350] rand) |
|-----|--------------|-------------------|---------|-----------|-------------------------------------------|------------------|-----------------------|---------|----------|--------------------------------------------------|
| AAA | 0.818        | 0.547             | 1       | 3.194E-44 | 0.272                                     | 2.607            | 1.689                 | 1       | 1.06E-66 | 0.918                                            |
| AAC | 0.670        | 0.743             | 1       | 5.95E-11  | -0.072                                    | 1.258            | 1.417                 | 1       | 1.46E-14 | -0.159                                           |
| AAG | 1.292        | 0.951             | 1       | 2.048E-65 | 0.341                                     | 1.744            | 1.476                 | 1       | 1.55E-30 | 0.268                                            |
| AAT | 0.439        | 0.516             | 1       | 3.259E-12 | -0.077                                    | 1.357            | 1.431                 | 1       | 0.01854  | -0.074                                           |
| ACA | 0.642        | 0.743             | 1       | 3.675E-23 | -0.102                                    | 1.469            | 1.423                 | 0       | 0.387044 | 0.046                                            |
| ACC | 1.062        | 1.358             | 1       | 3.673E-57 | -0.296                                    | 1.379            | 1.610                 | 1       | 7.52E-30 | -0.231                                           |

|     |       |       |   |           |        |       |       |   |          |        |
|-----|-------|-------|---|-----------|--------|-------|-------|---|----------|--------|
| ACG | 0.903 | 1.490 | 1 | 1.66E-268 | -0.588 | 0.768 | 1.515 | 1 | 0        | -0.747 |
| ACT | 0.822 | 0.825 | 0 | 0.4344062 | -0.003 | 1.325 | 1.315 | 0 | 0.291719 | 0.010  |
| AGA | 1.287 | 0.952 | 1 | 1.194E-64 | 0.334  | 1.789 | 1.478 | 1 | 7.42E-36 | 0.312  |
| AGC | 2.165 | 1.618 | 1 | 2.61E-123 | 0.547  | 1.793 | 1.524 | 1 | 2.01E-32 | 0.269  |
| AGG | 2.311 | 1.979 | 1 | 9.101E-42 | 0.333  | 2.260 | 1.626 | 1 | 3.3E-122 | 0.634  |
| AGT | 1.100 | 0.970 | 1 | 2.385E-12 | 0.131  | 1.252 | 1.281 | 0 | 0.502634 | -0.029 |
| ATA | 0.258 | 0.494 | 1 | 9.72E-125 | -0.236 | 0.860 | 1.433 | 1 | 4.4E-193 | -0.574 |
| ATC | 0.557 | 0.803 | 1 | 1.631E-97 | -0.246 | 0.994 | 1.314 | 1 | 9.88E-59 | -0.320 |
| ATG | 0.728 | 0.936 | 1 | 1.745E-39 | -0.207 | 1.021 | 1.287 | 1 | 1.49E-57 | -0.266 |
| ATT | 0.516 | 0.590 | 1 | 6.57E-14  | -0.073 | 1.332 | 1.378 | 0 | 0.231387 | -0.047 |
| CAA | 0.730 | 0.755 | 1 | 4.105E-05 | -0.026 | 1.470 | 1.427 | 0 | 0.118211 | 0.044  |
| CAC | 1.074 | 1.356 | 1 | 1.165E-59 | -0.282 | 1.676 | 1.611 | 0 | 0.059437 | 0.065  |
| CAG | 2.155 | 1.623 | 1 | 8.87E-117 | 0.532  | 2.284 | 1.518 | 1 | 2.1E-226 | 0.766  |
| CAT | 0.651 | 0.813 | 1 | 2.143E-36 | -0.162 | 1.024 | 1.314 | 1 | 1.38E-61 | -0.290 |
| CCA | 1.473 | 1.401 | 1 | 0.0024857 | 0.071  | 1.995 | 1.616 | 1 | 3.09E-62 | 0.379  |
| CCC | 2.778 | 3.157 | 1 | 1.899E-12 | -0.378 | 2.719 | 2.497 | 1 | 3.48E-21 | 0.222  |
| CCG | 3.131 | 3.293 | 1 | 5.144E-16 | -0.162 | 1.618 | 2.138 | 1 | 1.1E-96  | -0.520 |
| CCT | 1.976 | 1.722 | 1 | 1.337E-24 | 0.254  | 2.176 | 1.622 | 1 | 7.19E-91 | 0.554  |
| CGA | 1.078 | 1.510 | 1 | 1.27E-139 | -0.432 | 0.827 | 1.513 | 1 | 5.1E-285 | -0.687 |
| CGC | 3.362 | 3.311 | 1 | 3.612E-09 | 0.051  | 1.641 | 2.139 | 1 | 1.68E-91 | -0.498 |
| CGG | 3.790 | 3.808 | 1 | 5.945E-11 | -0.018 | 1.558 | 2.070 | 1 | 3.3E-101 | -0.512 |
| CGT | 1.088 | 1.736 | 1 | 9.85E-294 | -0.647 | 0.708 | 1.445 | 1 | 0        | -0.737 |
| CTA | 0.580 | 0.798 | 1 | 4.591E-72 | -0.218 | 0.992 | 1.309 | 1 | 2.15E-59 | -0.318 |
| CTC | 2.177 | 1.746 | 1 | 2.384E-59 | 0.431  | 2.207 | 1.622 | 1 | 6.22E-94 | 0.585  |
| CTG | 2.579 | 1.890 | 1 | 1.34E-192 | 0.689  | 2.149 | 1.453 | 1 | 5E-199   | 0.697  |
| CTT | 1.331 | 1.074 | 1 | 2.199E-35 | 0.257  | 1.612 | 1.374 | 1 | 5.86E-29 | 0.238  |
| GAA | 1.230 | 0.941 | 1 | 1.228E-54 | 0.289  | 1.671 | 1.473 | 1 | 2.72E-17 | 0.197  |
| GAC | 1.253 | 1.534 | 1 | 1.396E-51 | -0.281 | 1.177 | 1.516 | 1 | 4.38E-71 | -0.340 |
| GAG | 2.750 | 2.021 | 1 | 9.79E-139 | 0.729  | 2.154 | 1.632 | 1 | 1.14E-58 | 0.522  |
| GAT | 0.659 | 0.927 | 1 | 1.163E-84 | -0.268 | 0.943 | 1.279 | 1 | 7.86E-70 | -0.336 |
| GCA | 1.602 | 1.564 | 0 | 0.6949699 | 0.037  | 1.579 | 1.514 | 0 | 0.11215  | 0.064  |
| GCC | 3.419 | 3.327 | 1 | 0.0223591 | 0.092  | 2.345 | 2.142 | 1 | 5.91E-14 | 0.203  |
| GCG | 4.002 | 3.836 | 1 | 4.071E-11 | 0.166  | 1.560 | 2.078 | 1 | 2E-117   | -0.518 |
| GCT | 2.477 | 1.868 | 1 | 1.51E-146 | 0.609  | 1.731 | 1.449 | 1 | 1.67E-32 | 0.283  |
| GGA | 2.427 | 1.987 | 1 | 1.482E-63 | 0.440  | 1.976 | 1.618 | 1 | 9.82E-56 | 0.358  |
| GGC | 4.173 | 3.860 | 1 | 7.107E-15 | 0.314  | 2.307 | 2.079 | 1 | 1.86E-13 | 0.228  |
| GGG | 3.781 | 4.712 | 1 | 2.321E-57 | -0.931 | 2.646 | 2.293 | 1 | 1.25E-35 | 0.352  |
| GGT | 1.729 | 2.073 | 1 | 5.782E-64 | -0.344 | 1.325 | 1.446 | 1 | 9.42E-09 | -0.122 |
| GTA | 0.561 | 0.916 | 1 | 1.87E-163 | -0.354 | 0.789 | 1.281 | 1 | 8.8E-171 | -0.492 |
| GTC | 1.465 | 1.766 | 1 | 5.475E-64 | -0.301 | 1.172 | 1.439 | 1 | 6.5E-44  | -0.267 |
| GTG | 1.912 | 2.097 | 1 | 5.428E-22 | -0.186 | 1.454 | 1.442 | 0 | 0.143382 | 0.012  |
| GTT | 1.093 | 1.153 | 1 | 0.0061886 | -0.060 | 1.132 | 1.284 | 1 | 2.49E-15 | -0.152 |
| TAA | 0.443 | 0.514 | 1 | 4.087E-09 | -0.070 | 1.209 | 1.423 | 1 | 1.38E-21 | -0.214 |
| TAC | 0.436 | 0.786 | 1 | 7.4E-203  | -0.350 | 0.834 | 1.318 | 1 | 1.4E-142 | -0.484 |



|     |       |       |   |           |        |       |       |   |          |        |
|-----|-------|-------|---|-----------|--------|-------|-------|---|----------|--------|
| TAG | 0.670 | 0.924 | 1 | 1.065E-76 | -0.254 | 0.911 | 1.284 | 1 | 4.71E-92 | -0.373 |
| TAT | 0.309 | 0.567 | 1 | 6.44E-127 | -0.258 | 0.876 | 1.386 | 1 | 5.8E-150 | -0.509 |
| TCA | 0.830 | 0.834 | 0 | 0.2012681 | -0.004 | 1.409 | 1.315 | 1 | 1.28E-05 | 0.094  |
| TCC | 2.117 | 1.731 | 1 | 8.48E-56  | 0.386  | 2.077 | 1.624 | 1 | 1.74E-71 | 0.453  |
| TCG | 1.254 | 1.743 | 1 | 1.08E-164 | -0.490 | 0.795 | 1.438 | 1 | 5E-259   | -0.644 |
| TCT | 1.402 | 1.094 | 1 | 2.304E-45 | 0.307  | 1.726 | 1.372 | 1 | 2.02E-50 | 0.354  |
| TGA | 1.106 | 0.974 | 1 | 2.102E-13 | 0.133  | 1.355 | 1.290 | 1 | 0.007369 | 0.065  |
| TGC | 1.836 | 1.809 | 0 | 0.2064999 | 0.027  | 1.475 | 1.446 | 0 | 0.184563 | 0.029  |
| TGG | 2.255 | 2.134 | 1 | 4.946E-08 | 0.121  | 1.795 | 1.448 | 1 | 4.98E-51 | 0.347  |
| TGT | 1.138 | 1.156 | 1 | 0.0225222 | -0.018 | 1.262 | 1.274 | 1 | 0.004641 | -0.012 |
| TTA | 0.438 | 0.580 | 1 | 1.268E-36 | -0.143 | 1.187 | 1.387 | 1 | 1.09E-15 | -0.200 |
| TTC | 1.403 | 1.087 | 1 | 4.787E-59 | 0.316  | 1.636 | 1.374 | 1 | 8.9E-32  | 0.262  |
| TTG | 1.104 | 1.151 | 1 | 0.000423  | -0.047 | 1.256 | 1.276 | 0 | 0.848099 | -0.020 |
| TTT | 1.203 | 0.824 | 1 | 4.301E-54 | 0.378  | 2.344 | 1.496 | 1 | 6.85E-71 | 0.848  |

**TABLE S1** This table is complementary to Fig. 2 of the main text. It provides the two-sample Kolmogorov–Smirnov *p*-values for the statistical significance of the enrichment levels for all 64 nucleotide triplets. Triplets colored in yellow did not show significant enrichment or depletion at [0;100], triplets colored in blue did not show significant enrichment or depletion at [-450;-350], triplets colored in green did not show significant enrichment or depletion at both [0;100] and [-450;-350].

|    | Mean [0;100] | Mean [0;100] Rand | KS-test | P-Value   | $\Delta$ (Mean [0;100]-Mean [0;100] rand) | Mean [-450;-350] | Mean [-450;-350] Rand | KS-test | P-Value   | $\Delta$ (Mean [-450;-350]-Mean[-450;-350] rand) |
|----|--------------|-------------------|---------|-----------|-------------------------------------------|------------------|-----------------------|---------|-----------|--------------------------------------------------|
| AA | 3.254        | 2.703             | 1       | 1.72E-35  | 0.551                                     | 6.796            | 5.728                 | 1       | 1.19E-38  | 1.068                                            |
| AC | 3.465        | 4.501             | 1       | 8.25E-197 | -1.04                                     | 4.945            | 5.825                 | 1       | 8.82E-125 | -0.88                                            |
| AG | 6.934        | 5.332             | 1       | 5.40E-260 | 1.602                                     | 7.18             | 5.815                 | 1       | 1.69E-189 | 1.365                                            |
| AT | 2.079        | 2.886             | 1       | 2.58E-128 | -0.81                                     | 4.045            | 5.13                  | 1       | 5.94E-108 | -1.084                                           |
| CA | 4.657        | 4.484             | 1       | 8.91E-05  | 0.173                                     | 6.462            | 5.833                 | 1       | 1.24E-49  | 0.629                                            |
| CC | 9.46         | 9.476             | 0       | 0.904168  | -0.02                                     | 8.984            | 8.125                 | 1       | 5.79E-31  | 0.859                                            |
| CG | 9.408        | 10.35             | 1       | 3.33E-55  | -0.94                                     | 5.106            | 7.374                 | 1       | 0         | -2.268                                           |
| CT | 6.731        | 5.332             | 1       | 1.81E-189 | 1.4                                       | 7.004            | 5.669                 | 1       | 5.97E-185 | 1.335                                            |
| GA | 5.958        | 5.335             | 1       | 1.61E-40  | 0.622                                     | 5.993            | 5.816                 | 1       | 0.040686  | 0.177                                            |
| GC | 11.61        | 10.34             | 1       | 1.07E-92  | 1.27                                      | 7.576            | 7.383                 | 0       | 0.090044  | 0.193                                            |
| GG | 12.23        | 12.53             | 1       | 0.00061   | -0.3                                      | 8.52             | 7.594                 | 1       | 5.66E-40  | 0.925                                            |
| GT | 5.087        | 5.97              | 1       | 6.45E-102 | -0.88                                     | 4.58             | 5.343                 | 1       | 2.09E-100 | -0.763                                           |
| TA | 1.877        | 2.9               | 1       | 8.01E-208 | -1.02                                     | 3.703            | 5.117                 | 1       | 1.09E-186 | -1.414                                           |
| TC | 5.655        | 5.325             | 1       | 3.19E-10  | 0.33                                      | 6.075            | 5.688                 | 1       | 5.34E-15  | 0.388                                            |
| TG | 6.402        | 5.96              | 1       | 1.95E-19  | 0.442                                     | 5.875            | 5.35                  | 1       | 9.20E-36  | 0.525                                            |
| TT | 4.19         | 3.569             | 1       | 4.36E-28  | 0.621                                     | 6.157            | 5.212                 | 1       | 5.49E-33  | 0.944                                            |

**TABLE S2 This table is complementary to Fig. S5 of Supplemental Information. It provides the two-sample Kolmogorov–Smirnov *p*-values for the statistical significance of the enrichment levels for all 16 nucleotide doublets. Doubles colored in yellow did not show significant enrichment or depletion at [0;100], doublets colored in blue did not show significant enrichment or depletion at [-450;-350], doublets colored in green did not show significant enrichment or depletion at both [0;100] and [-450;-350]. In particular, in the interval [0;100], 15 out of 16 doublets showed a significant enrichment/depletion. In the interval [-450; -350], 15 out of 16 doublets showed a significant enrichment/depletion.**

|      | Mean [0;100] | Mean [0;100] Rand | KS-test | P-Value   | $\Delta$ (Mean [0;100]-Mean [0;100] rand) | Mean [-450;-350] | Mean [-450;-350] Rand | KS-test | P-Value   | $\Delta$ (Mean [-450;-350]-Mean[-450;-350] rand) |
|------|--------------|-------------------|---------|-----------|-------------------------------------------|------------------|-----------------------|---------|-----------|--------------------------------------------------|
| AAAA | 0.221        | 0.119             | 1       | 2.32E-16  | 0.102                                     | 0.987            | 0.473                 | 1       | 4.37E-55  | 0.514                                            |
| AAAC | 0.173        | 0.143             | 1       | 0.0004303 | 0.030                                     | 0.419            | 0.359                 | 1       | 6.36E-06  | 0.060                                            |
| AAAG | 0.281        | 0.183             | 1       | 2.43E-34  | 0.098                                     | 0.559            | 0.381                 | 1       | 6.25E-52  | 0.178                                            |
| AAAT | 0.134        | 0.111             | 1       | 0.0010087 | 0.023                                     | 0.5              | 0.373                 | 1       | 3.38E-19  | 0.127                                            |
| AACA | 0.146        | 0.142             | 0       | 1         | 0.004                                     | 0.367            | 0.358                 | 0       | 0.985359  | 0.009                                            |
| AACC | 0.203        | 0.226             | 0       | 0.3874321 | -0.023                                    | 0.348            | 0.367                 | 0       | 0.361213  | -0.019                                           |
| AACG | 0.154        | 0.261             | 1       | 9.20E-32  | -0.107                                    | 0.183            | 0.348                 | 1       | 8.77E-78  | -0.165                                           |
| AACT | 0.16         | 0.153             | 0       | 0.2207591 | 0.008                                     | 0.333            | 0.311                 | 0       | 0.079623  | 0.021                                            |
| AAGA | 0.292        | 0.18              | 1       | 2.83E-40  | 0.112                                     | 0.452            | 0.377                 | 1       | 8.77E-13  | 0.075                                            |
| AAGC | 0.351        | 0.254             | 1       | 1.21E-26  | 0.097                                     | 0.408            | 0.352                 | 1       | 1.10E-08  | 0.055                                            |
| AAGG | 0.408        | 0.327             | 1       | 1.28E-14  | 0.081                                     | 0.492            | 0.385                 | 1       | 7.30E-21  | 0.106                                            |
| AAGT | 0.228        | 0.177             | 1       | 3.38E-12  | 0.050                                     | 0.349            | 0.313                 | 1       | 0.009745  | 0.036                                            |
| AATA | 0.075        | 0.109             | 1       | 0.0028256 | -0.035                                    | 0.311            | 0.372                 | 1       | 2.41E-10  | -0.061                                           |
| AATC | 0.121        | 0.143             | 0       | 0.0680461 | -0.023                                    | 0.281            | 0.315                 | 1       | 7.23E-05  | -0.034                                           |
| AATG | 0.143        | 0.176             | 1       | 0.0426714 | -0.033                                    | 0.313            | 0.312                 | 0       | 0.765907  | 0.000                                            |
| AATT | 0.097        | 0.128             | 0       | 0.2032548 | -0.031                                    | 0.355            | 0.34                  | 0       | 0.530452  | 0.015                                            |
| ACAA | 0.127        | 0.15              | 0       | 0.3516819 | -0.023                                    | 0.342            | 0.355                 | 0       | 0.219633  | -0.012                                           |
| ACAC | 0.153        | 0.224             | 1       | 9.48E-21  | -0.071                                    | 0.337            | 0.363                 | 1       | 4.96E-10  | -0.026                                           |
| ACAG | 0.258        | 0.265             | 0       | 1         | -0.008                                    | 0.463            | 0.35                  | 1       | 1.03E-32  | 0.113                                            |
| ACAT | 0.098        | 0.15              | 1       | 3.33E-07  | -0.051                                    | 0.242            | 0.31                  | 1       | 5.13E-15  | -0.068                                           |
| ACCA | 0.185        | 0.223             | 1       | 0.0002353 | -0.038                                    | 0.334            | 0.369                 | 1       | 0.000256  | -0.035                                           |
| ACCC | 0.34         | 0.433             | 1       | 6.80E-21  | -0.094                                    | 0.456            | 0.495                 | 1       | 0.002679  | -0.039                                           |
| ACCG | 0.292        | 0.478             | 1       | 9.18E-82  | -0.186                                    | 0.243            | 0.435                 | 1       | 2.06E-92  | -0.192                                           |
| ACCT | 0.232        | 0.248             | 0       | 0.6791332 | -0.016                                    | 0.368            | 0.342                 | 1       | 0.021324  | 0.026                                            |
| ACGA | 0.121        | 0.26              | 1       | 2.89E-57  | -0.139                                    | 0.152            | 0.354                 | 1       | 2.59E-113 | -0.202                                           |
| ACGC | 0.32         | 0.473             | 1       | 5.71E-63  | -0.153                                    | 0.248            | 0.433                 | 1       | 3.39E-90  | -0.184                                           |
| ACGG | 0.295        | 0.555             | 1       | 8.88E-143 | -0.259                                    | 0.222            | 0.424                 | 1       | 5.63E-103 | -0.202                                           |
| ACGT | 0.158        | 0.275             | 1       | 1.18E-41  | -0.117                                    | 0.155            | 0.318                 | 1       | 8.22E-84  | -0.164                                           |
| ACTA | 0.089        | 0.147             | 1       | 1.30E-10  | -0.058                                    | 0.202            | 0.311                 | 1       | 2.28E-31  | -0.109                                           |

|      |       |       |   |           |        |       |       |   |           |        |
|------|-------|-------|---|-----------|--------|-------|-------|---|-----------|--------|
| ACTC | 0.235 | 0.245 | 0 | 0.3580176 | -0.011 | 0.382 | 0.341 | 1 | 8.22E-06  | 0.041  |
| ACTG | 0.298 | 0.267 | 0 | 0.1819288 | 0.031  | 0.381 | 0.32  | 1 | 2.33E-09  | 0.061  |
| ACTT | 0.191 | 0.171 | 1 | 0.0107202 | 0.020  | 0.319 | 0.306 | 0 | 0.296602  | 0.013  |
| AGAA | 0.29  | 0.18  | 1 | 2.67E-34  | 0.110  | 0.518 | 0.381 | 1 | 3.97E-29  | 0.137  |
| AGAC | 0.262 | 0.254 | 0 | 0.9948072 | 0.009  | 0.357 | 0.355 | 0 | 0.792859  | 0.002  |
| AGAG | 0.531 | 0.342 | 1 | 3.08E-64  | 0.189  | 0.591 | 0.379 | 1 | 4.68E-64  | 0.212  |
| AGAT | 0.188 | 0.186 | 1 | 0.0035506 | 0.002  | 0.28  | 0.307 | 1 | 0.035946  | -0.028 |
| AGCA | 0.343 | 0.259 | 1 | 9.92E-16  | 0.084  | 0.415 | 0.351 | 1 | 3.03E-07  | 0.064  |
| AGCC | 0.656 | 0.467 | 1 | 3.90E-45  | 0.190  | 0.614 | 0.436 | 1 | 4.41E-50  | 0.177  |
| AGCG | 0.669 | 0.553 | 1 | 5.64E-10  | 0.116  | 0.341 | 0.431 | 1 | 1.10E-25  | -0.090 |
| AGCT | 0.476 | 0.268 | 1 | 3.77E-92  | 0.208  | 0.448 | 0.313 | 1 | 5.55E-43  | 0.135  |
| AGGA | 0.527 | 0.338 | 1 | 5.25E-58  | 0.189  | 0.577 | 0.382 | 1 | 3.49E-66  | 0.195  |
| AGGC | 0.723 | 0.547 | 1 | 8.60E-33  | 0.176  | 0.648 | 0.433 | 1 | 1.53E-72  | 0.216  |
| AGGG | 0.681 | 0.736 | 0 | 0.1305816 | -0.055 | 0.645 | 0.485 | 1 | 1.06E-26  | 0.160  |
| AGGT | 0.355 | 0.328 | 0 | 0.3108584 | 0.027  | 0.371 | 0.326 | 1 | 8.33E-07  | 0.045  |
| AGTA | 0.118 | 0.168 | 1 | 1.26E-07  | -0.050 | 0.233 | 0.313 | 1 | 2.32E-16  | -0.080 |
| AGTC | 0.316 | 0.28  | 1 | 5.83E-06  | 0.036  | 0.302 | 0.313 | 0 | 0.846948  | -0.012 |
| AGTG | 0.397 | 0.345 | 1 | 8.16E-09  | 0.052  | 0.381 | 0.322 | 1 | 1.95E-06  | 0.059  |
| AGTT | 0.256 | 0.197 | 1 | 1.04E-12  | 0.059  | 0.312 | 0.29  | 0 | 0.257892  | 0.022  |
| ATAA | 0.081 | 0.11  | 0 | 0.1218812 | -0.029 | 0.281 | 0.373 | 1 | 2.80E-20  | -0.092 |
| ATAC | 0.048 | 0.149 | 1 | 1.03E-32  | -0.101 | 0.16  | 0.311 | 1 | 1.35E-71  | -0.150 |
| ATAG | 0.067 | 0.176 | 1 | 1.44E-34  | -0.109 | 0.159 | 0.309 | 1 | 6.77E-65  | -0.150 |
| ATAT | 0.058 | 0.118 | 1 | 1.01E-08  | -0.060 | 0.212 | 0.34  | 1 | 1.26E-42  | -0.128 |
| ATCA | 0.096 | 0.149 | 1 | 1.16E-08  | -0.053 | 0.227 | 0.311 | 1 | 1.48E-20  | -0.084 |
| ATCC | 0.191 | 0.238 | 1 | 2.13E-11  | -0.047 | 0.314 | 0.342 | 0 | 0.28965   | -0.028 |
| ATCG | 0.114 | 0.275 | 1 | 2.14E-83  | -0.161 | 0.131 | 0.312 | 1 | 4.29E-108 | -0.181 |
| ATCT | 0.15  | 0.168 | 0 | 0.2358064 | -0.018 | 0.282 | 0.305 | 0 | 0.112337  | -0.023 |
| ATGA | 0.118 | 0.173 | 1 | 3.73E-08  | -0.055 | 0.24  | 0.313 | 1 | 2.16E-15  | -0.074 |
| ATGC | 0.153 | 0.279 | 1 | 1.30E-46  | -0.127 | 0.22  | 0.313 | 1 | 1.96E-26  | -0.093 |
| ATGG | 0.329 | 0.322 | 0 | 0.9905053 | 0.006  | 0.272 | 0.317 | 1 | 6.28E-06  | -0.045 |
| ATGT | 0.123 | 0.196 | 1 | 3.85E-14  | -0.074 | 0.23  | 0.29  | 1 | 1.13E-13  | -0.059 |
| ATTA | 0.066 | 0.117 | 1 | 1.40E-08  | -0.051 | 0.278 | 0.336 | 1 | 2.35E-05  | -0.057 |
| ATTC | 0.13  | 0.178 | 1 | 9.28E-06  | -0.048 | 0.278 | 0.304 | 1 | 0.024503  | -0.026 |
| ATTG | 0.145 | 0.188 | 1 | 1.52E-06  | -0.043 | 0.198 | 0.293 | 1 | 9.73E-29  | -0.094 |
| ATTT | 0.17  | 0.142 | 1 | 3.40E-05  | 0.027  | 0.482 | 0.345 | 1 | 6.38E-25  | 0.137  |
| CAAA | 0.167 | 0.145 | 1 | 0.0108053 | 0.023  | 0.491 | 0.358 | 1 | 3.00E-30  | 0.133  |
| CAAC | 0.17  | 0.228 | 1 | 5.68E-08  | -0.058 | 0.286 | 0.363 | 1 | 2.39E-15  | -0.077 |
| CAAG | 0.279 | 0.257 | 0 | 0.2952025 | 0.023  | 0.412 | 0.352 | 1 | 1.28E-08  | 0.060  |
| CAAT | 0.106 | 0.155 | 1 | 2.83E-05  | -0.049 | 0.226 | 0.311 | 1 | 1.56E-22  | -0.085 |
| CACA | 0.198 | 0.237 | 1 | 0.0001909 | -0.038 | 0.429 | 0.362 | 1 | 0.046583  | 0.067  |
| CACC | 0.357 | 0.439 | 1 | 3.05E-16  | -0.082 | 0.522 | 0.489 | 0 | 0.109726  | 0.033  |

|      |       |       |   |           |        |       |       |   |           |        |
|------|-------|-------|---|-----------|--------|-------|-------|---|-----------|--------|
| CACG | 0.255 | 0.464 | 1 | 8.85E-119 | -0.209 | 0.272 | 0.436 | 1 | 4.60E-68  | -0.164 |
| CACT | 0.255 | 0.239 | 0 | 0.9999999 | 0.016  | 0.408 | 0.343 | 1 | 7.45E-09  | 0.065  |
| CAGA | 0.378 | 0.265 | 1 | 2.80E-36  | 0.113  | 0.508 | 0.352 | 1 | 1.28E-44  | 0.157  |
| CAGC | 0.773 | 0.46  | 1 | 3.91E-99  | 0.312  | 0.671 | 0.436 | 1 | 2.06E-74  | 0.235  |
| CAGG | 0.647 | 0.553 | 1 | 8.66E-07  | 0.094  | 0.739 | 0.434 | 1 | 3.29E-145 | 0.306  |
| CAGT | 0.336 | 0.287 | 1 | 1.13E-09  | 0.048  | 0.366 | 0.313 | 1 | 1.35E-07  | 0.053  |
| CATA | 0.058 | 0.146 | 1 | 6.68E-26  | -0.088 | 0.17  | 0.311 | 1 | 9.09E-65  | -0.142 |
| CATC | 0.184 | 0.246 | 1 | 3.29E-14  | -0.062 | 0.281 | 0.337 | 1 | 3.63E-10  | -0.056 |
| CATG | 0.24  | 0.276 | 1 | 0.0086397 | -0.035 | 0.237 | 0.313 | 1 | 1.02E-20  | -0.076 |
| CATT | 0.163 | 0.168 | 0 | 1         | -0.006 | 0.309 | 0.304 | 0 | 1         | 0.005  |
| CCAA | 0.229 | 0.215 | 0 | 0.9974366 | 0.014  | 0.438 | 0.368 | 1 | 1.76E-08  | 0.069  |
| CCAC | 0.359 | 0.44  | 1 | 6.23E-19  | -0.081 | 0.56  | 0.492 | 1 | 4.57E-08  | 0.069  |
| CCAG | 0.631 | 0.461 | 1 | 2.75E-33  | 0.170  | 0.738 | 0.437 | 1 | 1.72E-127 | 0.301  |
| CCAT | 0.237 | 0.239 | 0 | 0.8971656 | -0.002 | 0.282 | 0.342 | 1 | 4.49E-09  | -0.060 |
| CCCA | 0.458 | 0.431 | 0 | 0.7678608 | 0.026  | 0.691 | 0.494 | 1 | 4.91E-55  | 0.197  |
| CCCC | 0.804 | 1.097 | 1 | 4.34E-18  | -0.294 | 0.855 | 0.912 | 1 | 0.046896  | -0.058 |
| CCCG | 0.922 | 1.035 | 1 | 5.00E-24  | -0.112 | 0.681 | 0.724 | 1 | 1.36E-05  | -0.043 |
| CCCT | 0.562 | 0.532 | 0 | 0.9997722 | 0.029  | 0.625 | 0.507 | 1 | 1.60E-18  | 0.117  |
| CCGA | 0.365 | 0.464 | 1 | 4.46E-27  | -0.099 | 0.268 | 0.437 | 1 | 5.57E-66  | -0.168 |
| CCGC | 1.272 | 1.053 | 1 | 1.66E-08  | 0.218  | 0.688 | 0.726 | 1 | 1.88E-16  | -0.038 |
| CCGG | 1.149 | 1.115 | 0 | 0.5744381 | 0.034  | 0.563 | 0.657 | 1 | 1.09E-12  | -0.094 |
| CCGT | 0.311 | 0.558 | 1 | 2.69E-120 | -0.247 | 0.223 | 0.42  | 1 | 9.11E-95  | -0.197 |
| CCTA | 0.157 | 0.244 | 1 | 1.84E-24  | -0.087 | 0.278 | 0.346 | 1 | 1.28E-11  | -0.068 |
| CCTC | 0.742 | 0.55  | 1 | 6.96E-24  | 0.191  | 0.783 | 0.5   | 1 | 5.24E-73  | 0.282  |
| CCTG | 0.681 | 0.53  | 1 | 4.93E-22  | 0.151  | 0.669 | 0.422 | 1 | 8.70E-108 | 0.247  |
| CCTT | 0.372 | 0.326 | 1 | 0.0005468 | 0.047  | 0.458 | 0.363 | 1 | 3.77E-12  | 0.095  |
| CGAA | 0.172 | 0.265 | 1 | 3.66E-21  | -0.093 | 0.199 | 0.353 | 1 | 1.54E-67  | -0.154 |
| CGAC | 0.258 | 0.471 | 1 | 9.18E-108 | -0.213 | 0.196 | 0.437 | 1 | 8.90E-147 | -0.242 |
| CGAG | 0.525 | 0.555 | 1 | 5.47E-05  | -0.029 | 0.333 | 0.432 | 1 | 7.06E-30  | -0.098 |
| CGAT | 0.11  | 0.267 | 1 | 4.32E-87  | -0.157 | 0.114 | 0.314 | 1 | 2.74E-132 | -0.201 |
| CGCA | 0.455 | 0.486 | 1 | 0.0005802 | -0.031 | 0.308 | 0.434 | 1 | 5.52E-48  | -0.127 |
| CGCC | 1.142 | 1.048 | 1 | 0.0076493 | 0.094  | 0.692 | 0.722 | 1 | 2.10E-06  | -0.030 |
| CGCG | 1.098 | 1.104 | 1 | 1.59E-19  | -0.006 | 0.451 | 0.655 | 1 | 6.07E-72  | -0.205 |
| CGCT | 0.638 | 0.537 | 1 | 3.54E-06  | 0.101  | 0.326 | 0.421 | 1 | 4.87E-24  | -0.094 |
| CGGA | 0.652 | 0.554 | 1 | 3.91E-09  | 0.098  | 0.321 | 0.428 | 1 | 2.12E-30  | -0.107 |
| CGGC | 1.425 | 1.117 | 1 | 2.04E-18  | 0.308  | 0.527 | 0.657 | 1 | 7.79E-39  | -0.129 |
| CGGG | 1.205 | 1.358 | 1 | 1.19E-22  | -0.153 | 0.596 | 0.671 | 1 | 4.35E-10  | -0.075 |
| CGGT | 0.47  | 0.61  | 1 | 1.20E-50  | -0.140 | 0.202 | 0.393 | 1 | 4.06E-98  | -0.191 |
| CGTA | 0.108 | 0.27  | 1 | 7.41E-88  | -0.162 | 0.088 | 0.316 | 1 | 1.31E-173 | -0.227 |
| CGTC | 0.371 | 0.551 | 1 | 1.12E-70  | -0.180 | 0.234 | 0.425 | 1 | 1.66E-89  | -0.191 |
| CGTG | 0.387 | 0.613 | 1 | 1.71E-117 | -0.226 | 0.259 | 0.398 | 1 | 1.08E-48  | -0.138 |

|      |       |       |   |           |        |       |       |   |           |        |
|------|-------|-------|---|-----------|--------|-------|-------|---|-----------|--------|
| CGTT | 0.211 | 0.333 | 1 | 9.28E-44  | -0.123 | 0.155 | 0.319 | 1 | 1.12E-80  | -0.163 |
| CTAA | 0.107 | 0.144 | 1 | 2.93E-05  | -0.037 | 0.28  | 0.316 | 1 | 0.001088  | -0.037 |
| CTAC | 0.161 | 0.253 | 1 | 2.34E-23  | -0.092 | 0.245 | 0.341 | 1 | 9.69E-24  | -0.096 |
| CTAG | 0.22  | 0.269 | 1 | 1.45E-08  | -0.049 | 0.259 | 0.317 | 1 | 1.62E-09  | -0.058 |
| CTAT | 0.085 | 0.173 | 1 | 7.33E-24  | -0.087 | 0.171 | 0.306 | 1 | 4.13E-57  | -0.135 |
| CTCA | 0.287 | 0.245 | 1 | 0.0001026 | 0.042  | 0.479 | 0.34  | 1 | 6.58E-38  | 0.140  |
| CTCC | 0.853 | 0.539 | 1 | 1.31E-74  | 0.314  | 0.852 | 0.498 | 1 | 1.52E-125 | 0.354  |
| CTCG | 0.503 | 0.53  | 1 | 7.25E-08  | -0.027 | 0.344 | 0.422 | 1 | 1.59E-19  | -0.078 |
| CTCT | 0.513 | 0.33  | 1 | 1.60E-59  | 0.183  | 0.548 | 0.359 | 1 | 5.59E-59  | 0.189  |
| CTGA | 0.397 | 0.268 | 1 | 2.98E-36  | 0.129  | 0.438 | 0.312 | 1 | 2.55E-36  | 0.126  |
| CTGC | 0.897 | 0.529 | 1 | 6.68E-104 | 0.368  | 0.603 | 0.423 | 1 | 1.31E-47  | 0.181  |
| CTGG | 0.829 | 0.604 | 1 | 3.23E-40  | 0.225  | 0.695 | 0.399 | 1 | 1.78E-141 | 0.296  |
| CTGT | 0.427 | 0.328 | 1 | 3.40E-13  | 0.099  | 0.393 | 0.315 | 1 | 1.26E-11  | 0.078  |
| CTTA | 0.116 | 0.17  | 1 | 4.88E-07  | -0.054 | 0.231 | 0.308 | 1 | 1.56E-15  | -0.077 |
| CTTC | 0.543 | 0.322 | 1 | 1.37E-85  | 0.221  | 0.489 | 0.359 | 1 | 6.01E-27  | 0.129  |
| CTTG | 0.307 | 0.338 | 1 | 0.014088  | -0.031 | 0.358 | 0.317 | 1 | 0.000418  | 0.041  |
| CTTT | 0.351 | 0.229 | 1 | 1.59E-36  | 0.122  | 0.477 | 0.334 | 1 | 1.47E-37  | 0.143  |
| GAAA | 0.288 | 0.185 | 1 | 4.07E-37  | 0.103  | 0.552 | 0.383 | 1 | 9.92E-43  | 0.169  |
| GAAC | 0.229 | 0.265 | 0 | 0.0667583 | -0.036 | 0.314 | 0.349 | 1 | 0.040134  | -0.035 |
| GAAG | 0.568 | 0.331 | 1 | 1.67E-111 | 0.237  | 0.489 | 0.383 | 1 | 1.39E-19  | 0.106  |
| GAAT | 0.131 | 0.172 | 1 | 1.41E-05  | -0.041 | 0.277 | 0.309 | 1 | 0.004406  | -0.032 |
| GACA | 0.209 | 0.263 | 1 | 4.03E-07  | -0.054 | 0.311 | 0.346 | 1 | 0.008365  | -0.035 |
| GACC | 0.359 | 0.474 | 1 | 1.36E-29  | -0.116 | 0.343 | 0.44  | 1 | 6.14E-22  | -0.097 |
| GACG | 0.382 | 0.558 | 1 | 3.39E-57  | -0.175 | 0.228 | 0.431 | 1 | 2.58E-100 | -0.202 |
| GACT | 0.288 | 0.266 | 0 | 0.9109212 | 0.022  | 0.31  | 0.318 | 0 | 0.295203  | -0.008 |
| GAGA | 0.477 | 0.34  | 1 | 1.85E-34  | 0.137  | 0.557 | 0.381 | 1 | 3.74E-42  | 0.176  |
| GAGC | 0.83  | 0.555 | 1 | 3.11E-62  | 0.276  | 0.508 | 0.431 | 1 | 4.01E-08  | 0.077  |
| GAGG | 1.013 | 0.736 | 1 | 4.92E-51  | 0.277  | 0.758 | 0.484 | 1 | 5.95E-70  | 0.274  |
| GAGT | 0.401 | 0.336 | 1 | 3.24E-10  | 0.065  | 0.327 | 0.32  | 0 | 0.999997  | 0.007  |
| GATA | 0.072 | 0.175 | 1 | 1.51E-31  | -0.103 | 0.153 | 0.309 | 1 | 6.62E-71  | -0.156 |
| GATC | 0.17  | 0.27  | 1 | 6.07E-34  | -0.100 | 0.248 | 0.328 | 1 | 1.23E-20  | -0.080 |
| GATG | 0.258 | 0.331 | 1 | 4.58E-14  | -0.073 | 0.246 | 0.319 | 1 | 7.05E-18  | -0.073 |
| GATT | 0.153 | 0.189 | 1 | 0.0006216 | -0.036 | 0.258 | 0.291 | 1 | 0.002102  | -0.032 |
| GCAA | 0.232 | 0.272 | 0 | 0.0836628 | -0.040 | 0.333 | 0.351 | 0 | 0.264289  | -0.018 |
| GCAC | 0.315 | 0.466 | 1 | 9.53E-58  | -0.151 | 0.372 | 0.434 | 1 | 2.49E-10  | -0.063 |
| GCAG | 0.87  | 0.564 | 1 | 1.74E-93  | 0.306  | 0.645 | 0.432 | 1 | 6.02E-62  | 0.213  |
| GCAT | 0.167 | 0.275 | 1 | 1.96E-37  | -0.108 | 0.228 | 0.311 | 1 | 8.11E-24  | -0.083 |
| GCCA | 0.518 | 0.465 | 1 | 2.67E-05  | 0.054  | 0.514 | 0.436 | 1 | 1.54E-13  | 0.078  |
| GCCC | 0.938 | 1.018 | 1 | 7.28E-22  | -0.080 | 0.803 | 0.723 | 1 | 3.81E-05  | 0.080  |
| GCCG | 1.287 | 1.149 | 1 | 2.35E-05  | 0.139  | 0.5   | 0.658 | 1 | 3.07E-46  | -0.158 |
| GCCT | 0.64  | 0.551 | 1 | 2.55E-08  | 0.090  | 0.626 | 0.42  | 1 | 2.46E-65  | 0.206  |

|      |       |       |   |           |        |       |       |   |           |        |
|------|-------|-------|---|-----------|--------|-------|-------|---|-----------|--------|
| GCGA | 0.455 | 0.55  | 1 | 3.59E-24  | -0.095 | 0.278 | 0.433 | 1 | 1.90E-67  | -0.155 |
| GCGC | 1.258 | 1.107 | 1 | 5.72E-05  | 0.151  | 0.573 | 0.652 | 1 | 5.03E-15  | -0.079 |
| GCGG | 1.821 | 1.356 | 1 | 7.17E-36  | 0.465  | 0.588 | 0.673 | 1 | 2.63E-26  | -0.085 |
| GCGT | 0.433 | 0.601 | 1 | 1.21E-76  | -0.168 | 0.23  | 0.4   | 1 | 7.29E-77  | -0.170 |
| GCTA | 0.197 | 0.275 | 1 | 5.66E-18  | -0.077 | 0.235 | 0.318 | 1 | 6.70E-23  | -0.083 |
| GCTC | 0.721 | 0.516 | 1 | 7.06E-32  | 0.205  | 0.511 | 0.416 | 1 | 1.01E-13  | 0.095  |
| GCTG | 1.104 | 0.595 | 1 | 2.50E-150 | 0.509  | 0.615 | 0.395 | 1 | 4.38E-78  | 0.220  |
| GCTT | 0.434 | 0.335 | 1 | 1.22E-22  | 0.099  | 0.37  | 0.318 | 1 | 1.30E-06  | 0.053  |
| GGAA | 0.546 | 0.339 | 1 | 5.79E-87  | 0.207  | 0.545 | 0.381 | 1 | 2.42E-51  | 0.164  |
| GGAC | 0.474 | 0.56  | 1 | 1.05E-12  | -0.086 | 0.384 | 0.428 | 1 | 4.94E-05  | -0.044 |
| GGAG | 1.156 | 0.727 | 1 | 2.03E-117 | 0.429  | 0.767 | 0.483 | 1 | 1.03E-75  | 0.285  |
| GGAT | 0.225 | 0.324 | 1 | 1.03E-28  | -0.099 | 0.298 | 0.318 | 0 | 0.387432  | -0.020 |
| GGCA | 0.496 | 0.555 | 1 | 5.68E-08  | -0.059 | 0.464 | 0.43  | 1 | 0.004637  | 0.035  |
| GGCC | 1.118 | 1.133 | 1 | 0.0042573 | -0.014 | 0.71  | 0.656 | 1 | 0.000292  | 0.055  |
| GGCG | 1.645 | 1.349 | 1 | 1.06E-11  | 0.295  | 0.615 | 0.673 | 1 | 3.35E-10  | -0.058 |
| GGCT | 0.87  | 0.595 | 1 | 2.56E-65  | 0.275  | 0.574 | 0.394 | 1 | 8.19E-56  | 0.180  |
| GGGA | 0.807 | 0.727 | 1 | 2.72E-12  | 0.081  | 0.704 | 0.479 | 1 | 2.00E-76  | 0.225  |
| GGGC | 1.24  | 1.349 | 1 | 1.61E-17  | -0.109 | 0.744 | 0.669 | 1 | 1.62E-07  | 0.075  |
| GGGG | 1.148 | 1.801 | 1 | 2.86E-68  | -0.654 | 0.8   | 0.785 | 1 | 1.18E-07  | 0.015  |
| GGGT | 0.548 | 0.784 | 1 | 1.25E-62  | -0.236 | 0.434 | 0.427 | 0 | 1         | 0.007  |
| GGTA | 0.208 | 0.343 | 1 | 2.64E-40  | -0.134 | 0.189 | 0.326 | 1 | 1.06E-54  | -0.137 |
| GGTC | 0.449 | 0.605 | 1 | 6.23E-56  | -0.156 | 0.36  | 0.4   | 1 | 0.000185  | -0.041 |
| GGTG | 0.694 | 0.763 | 1 | 1.54E-07  | -0.069 | 0.447 | 0.423 | 0 | 0.19287   | 0.024  |
| GGTT | 0.361 | 0.398 | 1 | 0.0185169 | -0.037 | 0.318 | 0.31  | 0 | 0.598857  | 0.008  |
| GTAA | 0.147 | 0.172 | 0 | 0.3036719 | -0.024 | 0.225 | 0.314 | 1 | 3.57E-21  | -0.089 |
| GTAC | 0.11  | 0.272 | 1 | 1.04E-88  | -0.162 | 0.141 | 0.318 | 1 | 2.92E-102 | -0.177 |
| GTAG | 0.228 | 0.337 | 1 | 6.87E-27  | -0.109 | 0.223 | 0.324 | 1 | 1.86E-26  | -0.101 |
| GTAT | 0.071 | 0.19  | 1 | 4.65E-45  | -0.119 | 0.161 | 0.289 | 1 | 2.51E-47  | -0.127 |
| GTCA | 0.245 | 0.281 | 1 | 0.0002985 | -0.036 | 0.268 | 0.314 | 1 | 7.68E-08  | -0.046 |
| GTCC | 0.469 | 0.535 | 1 | 6.93E-15  | -0.066 | 0.39  | 0.427 | 1 | 0.004482  | -0.037 |
| GTCG | 0.378 | 0.612 | 1 | 1.29E-117 | -0.234 | 0.169 | 0.397 | 1 | 2.37E-138 | -0.229 |
| GTCT | 0.359 | 0.337 | 0 | 0.3857596 | 0.022  | 0.354 | 0.314 | 1 | 3.13E-05  | 0.040  |
| GTGA | 0.398 | 0.339 | 1 | 3.69E-10  | 0.059  | 0.358 | 0.324 | 1 | 0.003059  | 0.034  |
| GTGC | 0.456 | 0.605 | 1 | 2.25E-56  | -0.148 | 0.342 | 0.399 | 1 | 4.57E-08  | -0.057 |
| GTGG | 0.701 | 0.775 | 1 | 2.71E-07  | -0.074 | 0.454 | 0.421 | 0 | 0.214065  | 0.033  |
| GTGT | 0.335 | 0.397 | 1 | 1.56E-11  | -0.062 | 0.299 | 0.31  | 1 | 4.72E-06  | -0.010 |
| GTTA | 0.124 | 0.196 | 1 | 4.00E-14  | -0.071 | 0.187 | 0.291 | 1 | 7.51E-34  | -0.104 |
| GTTC | 0.313 | 0.346 | 0 | 0.1486678 | -0.033 | 0.28  | 0.319 | 1 | 0.005446  | -0.039 |
| GTTG | 0.337 | 0.393 | 1 | 9.94E-09  | -0.056 | 0.249 | 0.309 | 1 | 4.85E-09  | -0.059 |
| GTTT | 0.31  | 0.248 | 1 | 6.93E-15  | 0.062  | 0.39  | 0.306 | 1 | 9.72E-15  | 0.084  |
| TAAA | 0.134 | 0.107 | 1 | 0.0003774 | 0.027  | 0.436 | 0.371 | 1 | 0.000134  | 0.065  |

|      |       |       |   |           |        |       |       |   |           |        |
|------|-------|-------|---|-----------|--------|-------|-------|---|-----------|--------|
| TAAC | 0.093 | 0.145 | 1 | 6.64E-10  | -0.052 | 0.21  | 0.314 | 1 | 1.13E-31  | -0.103 |
| TAAG | 0.15  | 0.172 | 0 | 0.3791144 | -0.022 | 0.242 | 0.312 | 1 | 8.02E-14  | -0.070 |
| TAAT | 0.062 | 0.121 | 1 | 1.78E-08  | -0.059 | 0.255 | 0.346 | 1 | 1.23E-14  | -0.091 |
| TACA | 0.083 | 0.149 | 1 | 1.79E-13  | -0.066 | 0.275 | 0.313 | 1 | 4.94E-05  | -0.038 |
| TACC | 0.134 | 0.244 | 1 | 4.38E-41  | -0.110 | 0.185 | 0.346 | 1 | 6.65E-75  | -0.161 |
| TACG | 0.103 | 0.278 | 1 | 8.84E-98  | -0.174 | 0.096 | 0.313 | 1 | 1.22E-153 | -0.217 |
| TACT | 0.111 | 0.174 | 1 | 1.53E-09  | -0.063 | 0.227 | 0.305 | 1 | 1.49E-15  | -0.077 |
| TAGA | 0.125 | 0.179 | 1 | 3.36E-05  | -0.054 | 0.227 | 0.313 | 1 | 7.98E-19  | -0.086 |
| TAGC | 0.192 | 0.274 | 1 | 1.05E-18  | -0.082 | 0.229 | 0.313 | 1 | 1.23E-19  | -0.084 |
| TAGG | 0.223 | 0.337 | 1 | 6.85E-32  | -0.114 | 0.253 | 0.322 | 1 | 2.98E-13  | -0.069 |
| TAGT | 0.123 | 0.189 | 1 | 1.73E-12  | -0.066 | 0.185 | 0.292 | 1 | 1.80E-29  | -0.107 |
| TATA | 0.051 | 0.123 | 1 | 3.97E-12  | -0.071 | 0.177 | 0.34  | 1 | 1.75E-62  | -0.164 |
| TATC | 0.078 | 0.171 | 1 | 3.04E-28  | -0.093 | 0.157 | 0.304 | 1 | 1.94E-63  | -0.147 |
| TATG | 0.081 | 0.192 | 1 | 2.06E-38  | -0.111 | 0.168 | 0.29  | 1 | 8.52E-48  | -0.122 |
| TATT | 0.096 | 0.139 | 1 | 2.52E-05  | -0.044 | 0.316 | 0.343 | 1 | 0.007712  | -0.027 |
| TCAA | 0.123 | 0.148 | 1 | 0.0255913 | -0.026 | 0.299 | 0.311 | 0 | 0.940762  | -0.012 |
| TCAC | 0.22  | 0.251 | 1 | 0.0015397 | -0.031 | 0.362 | 0.342 | 0 | 0.476476  | 0.020  |
| TCAG | 0.354 | 0.276 | 1 | 8.59E-16  | 0.079  | 0.445 | 0.314 | 1 | 6.17E-38  | 0.131  |
| TCAT | 0.126 | 0.173 | 1 | 2.65E-06  | -0.047 | 0.246 | 0.303 | 1 | 5.68E-11  | -0.057 |
| TCCA | 0.297 | 0.235 | 1 | 1.85E-06  | 0.062  | 0.479 | 0.34  | 1 | 6.99E-41  | 0.138  |
| TCCC | 0.675 | 0.549 | 1 | 6.01E-14  | 0.126  | 0.743 | 0.507 | 1 | 8.75E-77  | 0.237  |
| TCCG | 0.608 | 0.531 | 1 | 0.0037732 | 0.077  | 0.32  | 0.421 | 1 | 1.12E-28  | -0.101 |
| TCCT | 0.517 | 0.319 | 1 | 1.25E-58  | 0.198  | 0.571 | 0.361 | 1 | 9.18E-78  | 0.210  |
| TCGA | 0.123 | 0.283 | 1 | 2.94E-75  | -0.160 | 0.143 | 0.312 | 1 | 3.94E-90  | -0.170 |
| TCGC | 0.469 | 0.546 | 1 | 6.60E-18  | -0.077 | 0.271 | 0.422 | 1 | 1.42E-57  | -0.151 |
| TCGG | 0.483 | 0.607 | 1 | 2.00E-35  | -0.124 | 0.272 | 0.395 | 1 | 2.25E-36  | -0.123 |
| TCGT | 0.165 | 0.334 | 1 | 2.06E-80  | -0.169 | 0.129 | 0.319 | 1 | 4.53E-108 | -0.189 |
| TCTA | 0.132 | 0.174 | 1 | 0.0001156 | -0.041 | 0.241 | 0.305 | 1 | 5.59E-11  | -0.064 |
| TCTC | 0.463 | 0.332 | 1 | 1.95E-30  | 0.130  | 0.546 | 0.362 | 1 | 1.26E-59  | 0.185  |
| TCTG | 0.477 | 0.339 | 1 | 1.23E-38  | 0.138  | 0.462 | 0.313 | 1 | 8.20E-47  | 0.150  |
| TCTT | 0.318 | 0.227 | 1 | 3.75E-21  | 0.091  | 0.409 | 0.333 | 1 | 2.06E-14  | 0.076  |
| TGAA | 0.208 | 0.168 | 1 | 0.0001207 | 0.040  | 0.371 | 0.309 | 1 | 3.05E-09  | 0.062  |
| TGAC | 0.245 | 0.276 | 1 | 0.0058242 | -0.031 | 0.262 | 0.315 | 1 | 3.09E-09  | -0.052 |
| TGAG | 0.513 | 0.341 | 1 | 1.85E-69  | 0.172  | 0.462 | 0.323 | 1 | 2.20E-38  | 0.139  |
| TGAT | 0.128 | 0.187 | 1 | 4.58E-14  | -0.059 | 0.2   | 0.292 | 1 | 2.15E-24  | -0.092 |
| TGCA | 0.297 | 0.276 | 0 | 0.1071655 | 0.020  | 0.394 | 0.314 | 1 | 7.11E-09  | 0.080  |
| TGCC | 0.481 | 0.537 | 1 | 1.98E-08  | -0.056 | 0.433 | 0.424 | 0 | 0.857022  | 0.009  |
| TGCG | 0.562 | 0.611 | 1 | 1.24E-16  | -0.050 | 0.262 | 0.397 | 1 | 8.41E-57  | -0.135 |
| TGCT | 0.478 | 0.321 | 1 | 1.46E-26  | 0.157  | 0.383 | 0.317 | 1 | 7.33E-09  | 0.065  |
| TGGA | 0.419 | 0.331 | 1 | 1.63E-16  | 0.088  | 0.393 | 0.321 | 1 | 5.48E-09  | 0.072  |
| TGGC | 0.755 | 0.613 | 1 | 1.48E-17  | 0.142  | 0.443 | 0.395 | 1 | 0.00061   | 0.047  |

|      |       |       |   |           |        |       |       |   |          |        |
|------|-------|-------|---|-----------|--------|-------|-------|---|----------|--------|
| TGGG | 0.717 | 0.764 | 1 | 5.98E-05  | -0.048 | 0.637 | 0.42  | 1 | 6.99E-81 | 0.217  |
| TGGT | 0.344 | 0.384 | 1 | 1.17E-05  | -0.039 | 0.308 | 0.313 | 0 | 0.981663 | -0.006 |
| TGTA | 0.123 | 0.192 | 1 | 1.28E-14  | -0.069 | 0.237 | 0.289 | 1 | 1.14E-07 | -0.052 |
| TGTC | 0.318 | 0.327 | 0 | 0.064245  | -0.009 | 0.285 | 0.314 | 1 | 8.57E-04 | -0.028 |
| TGTG | 0.424 | 0.397 | 0 | 0.5423292 | 0.027  | 0.367 | 0.311 | 0 | 0.155412 | 0.057  |
| TGTT | 0.258 | 0.253 | 0 | 0.2910308 | 0.005  | 0.319 | 0.305 | 0 | 0.999772 | 0.014  |
| TTAA | 0.097 | 0.118 | 0 | 0.2924167 | -0.021 | 0.355 | 0.339 | 0 | 0.850337 | 0.016  |
| TTAC | 0.112 | 0.171 | 1 | 9.30E-10  | -0.059 | 0.235 | 0.308 | 1 | 8.66E-14 | -0.073 |
| TTAG | 0.139 | 0.193 | 1 | 5.08E-07  | -0.054 | 0.25  | 0.289 | 1 | 0.000541 | -0.040 |
| TTAT | 0.085 | 0.146 | 1 | 2.57E-07  | -0.060 | 0.275 | 0.343 | 1 | 1.08E-11 | -0.069 |
| TTCA | 0.192 | 0.171 | 0 | 0.0720371 | 0.021  | 0.376 | 0.305 | 1 | 9.29E-11 | 0.071  |
| TTCC | 0.584 | 0.321 | 1 | 5.96E-127 | 0.263  | 0.552 | 0.363 | 1 | 7.51E-58 | 0.190  |
| TTCG | 0.25  | 0.353 | 1 | 1.51E-21  | -0.103 | 0.171 | 0.316 | 1 | 5.25E-63 | -0.145 |
| TTCT | 0.364 | 0.236 | 1 | 1.74E-50  | 0.129  | 0.477 | 0.333 | 1 | 4.58E-42 | 0.144  |
| TTGA | 0.178 | 0.192 | 0 | 0.7541037 | -0.014 | 0.259 | 0.29  | 1 | 0.01464  | -0.031 |
| TTGC | 0.306 | 0.333 | 1 | 0.0036129 | -0.027 | 0.307 | 0.317 | 0 | 0.351682 | -0.010 |
| TTGG | 0.373 | 0.388 | 0 | 0.2655821 | -0.015 | 0.36  | 0.313 | 1 | 8.07E-05 | 0.047  |
| TTGT | 0.236 | 0.247 | 0 | 1         | -0.012 | 0.284 | 0.305 | 0 | 0.065911 | -0.022 |
| TTTA | 0.128 | 0.147 | 0 | 0.9905053 | -0.019 | 0.413 | 0.345 | 1 | 3.33E-07 | 0.068  |
| TTTC | 0.399 | 0.232 | 1 | 5.11E-67  | 0.168  | 0.533 | 0.335 | 1 | 1.12E-72 | 0.198  |
| TTTG | 0.306 | 0.242 | 1 | 1.93E-12  | 0.064  | 0.403 | 0.305 | 1 | 1.04E-17 | 0.098  |
| TTTT | 0.357 | 0.198 | 1 | 2.61E-22  | 0.159  | 0.784 | 0.393 | 1 | 9.00E-61 | 0.392  |

**TABLE S3** This table is complementary to Fig. S6 of Supplemental Information. It provides the two-sample Kolmogorov–Smirnov  $p$ -values for the statistical significance of the enrichment levels for all 256 nucleotide quadruplets. Quadruplets colored in yellow did not show significant enrichment or depletion at [0;100], quadruplets colored in blue did not show significant enrichment or depletion at [-450;-350], quadruplets colored in green did not show significant enrichment or depletion at both [0;100] and [-450;-350]. In particular, in the interval [0;100], 215 out of 256 quadruplets showed a significant enrichment/depletion. In the interval [-450; -350], 225 out of 256 quadruplets showed a significant enrichment/depletion.
