# Supplementary material
Source: PubMed Central journal article supplement (PMC5448238)
Supplement: mmc2.pdf [file mmc2.pdf]

# Specificity-Determining DNA Triplet Code for Positioning of Human Preinitiation Complex

Matan Goldshtein<sup>1</sup> and David B. Lukatsky<sup>2,\*</sup>

<sup>1</sup>Avram and Stella Goldstein-Goren Department of Biotechnology Engineering and <sup>2</sup>Department of Chemistry, Ben-Gurion University of the Negev, Beer-Sheva, Israel

**ABSTRACT** The notion that transcription factors bind DNA only through specific, consensus binding sites has been recently questioned. No specific consensus motif for the positioning of the human preinitiation complex (PIC) has been identified. Here, we reveal that nonconsensus, statistical, DNA triplet code provides specificity for the positioning of the human PIC. In particular, we reveal a highly nonrandom, statistical pattern of repetitive nucleotide triplets that correlates with the genomewide binding preferences of PIC measured by Chip-exo. We analyze the triplet enrichment and depletion near the transcription start site and identify triplets that have the strongest effect on PIC-DNA nonconsensus binding. Using statistical mechanics, a random-binder model without fitting parameters, with genomic DNA sequence being the only input, we further validate that the nonconsensus nucleotide triplet code constitutes a key signature providing PIC binding specificity in the human genome. Our results constitute a proof-of-concept for, to our knowledge, a new design principle for protein-DNA recognition in the human genome, which can lead to a better mechanistic understanding of transcriptional regulation.

Transcription factors (TFs) are proteins that regulate gene expression. An established paradigm that TFs specifically recognize only relatively short (4–20 basepair (bp)) consensus DNA motifs (1–4) has been recently challenged by different high-throughput methods both in vivo and in vitro (5–8). Human preinitiation complex (PIC) represents one of the most striking examples where design principles of specific protein-DNA recognition remain unknown (5). In particular, in a recent study by Pugh and Venters (7) using the Chip-exo method, no specificity-determining consensus motifs for the positioning of PIC have been identified, thus challenging an established paradigm that the consensus TATA box motif provides the specificity (3,4,7).

Here, we reveal that the enrichment level of certain repetitive nucleotide triplets correlate with the genomewide binding preferences of TFIIB—a key component of PIC (7). The unprecedented, single-nucleotide resolution of the Chip-exo method (7) allows us to compare the computed model TF-DNA binding free energy with the measured TFIIB binding occupancy at each DNA basepair. Previously, we suggested a model for yeast PIC positioning based on a statistical, non-consensus protein-DNA binding mechanism (6–8). The non-consensus mechanism predicts that enrichment of certain repetitive DNA sequence elements can lead to an enhanced

protein-DNA binding (6–8). Here, we show that this mechanism (albeit with entirely different DNA sequence symmetries) also describes the positioning of the human PIC, using a simple random-binder model based on a 64-letter triplet alphabet, with the human genomic DNA sequence constituting the only input into the model (see below).

In particular, we analyzed the measured genomewide occupancy of TFIIB (Fig. 1), and revealed that the peak of this occupancy (positioned ~50 bp downstream of the transcription start site (TSS); Fig. 1) is characterized by a highly nonrandom probability distribution of repetitive nucleotide triplets (Fig. 2). This finding has led us to develop a minimal random-binder model based on a 64-letter triplet code as follows. We consider a model TF forming  $M$  contacts with DNA, sliding along the DNA sliding window with the width  $L$  (Fig. S1). Such sliding window can be positioned at any genomic position. To assign the nonconsensus free energy to the middle of the sliding window, we define the partition function as follows:

$$Z = \sum_{i=1}^{L-M+1} \exp(-U(i)/k_B T), \quad (1)$$

where  $k_B$  is the Boltzmann constant and  $T$  is the temperature, with the interaction potential  $U$ , as follows:

$$U(i) = \sum_{j=i}^{i+M-1} \sum_{\alpha} K_{\alpha} S_{\alpha}(j), \quad (2)$$

Submitted September 22, 2016, and accepted for publication April 14, 2017.

\*Correspondence: lukatsky@bgu.ac.il

Editor: Wilma Olson.

<http://dx.doi.org/10.1016/j.bpj.2017.04.023>

© 2017 Biophysical Society.

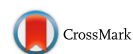

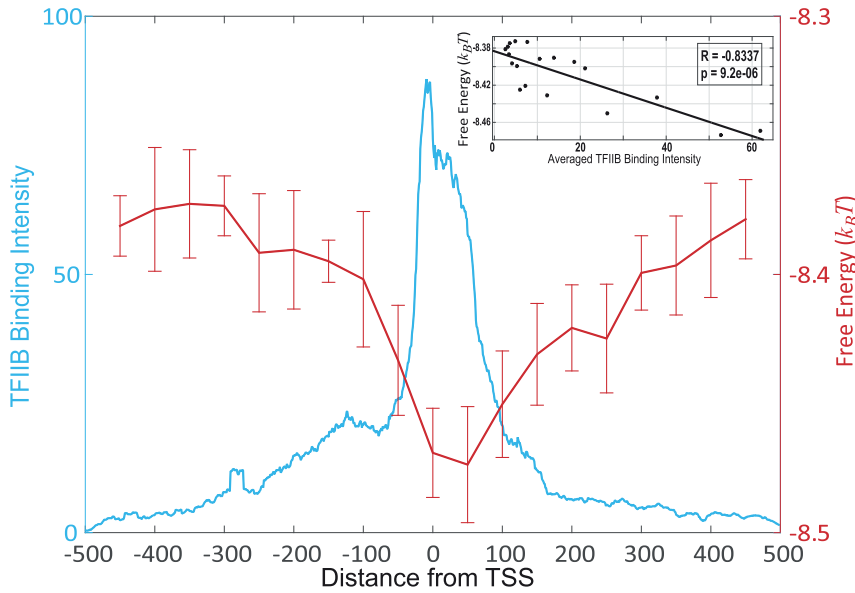

**FIGURE 1** Free energy of nonconsensus triplets based TFIIIB-DNA binding negatively correlates with the TFIIIB binding intensity. Shown here is the computed average free energy of nonconsensus TFIIIB-DNA binding and the profile of the average TFIIIB binding intensity measured by Pugh and Venters (7) around the TSSs of 6097 genes. The average free energy was calculated every 50 bp, within the interval (−450, 450 bp). To compute the free energy, we used a sliding window of 100 bp. To compute error bars, we calculated the mean free energy for each chromosome and divided the results into five randomly chosen subgroups and computed the mean for each subgroup. The error bars are defined as 1 SD of the mean of free energy between the subgroups. (*Inset*) Given here is the correlation between the free energy and the TFIIIB binding intensity with the Pearson correlation coefficient and the *p* value. To see this figure in color, go online.

where each sequence position *i* corresponds to a DNA triplet, and there are overall 64 possible nucleotide triplets,  $\alpha$  (Fig. S1). Here,  $K_\alpha$  is the vector containing 64 random energy parameters taken from the Gaussian distribution with

the zero mean (for simplicity) and the standard deviation,  $\sigma = 2 k_B T$  (the magnitude of  $\sigma$  sets the energy scale in the problem corresponding to a typical energy of one bond between amino acid and nucleotide basepair (9,10)); and  $S_\alpha(j)$

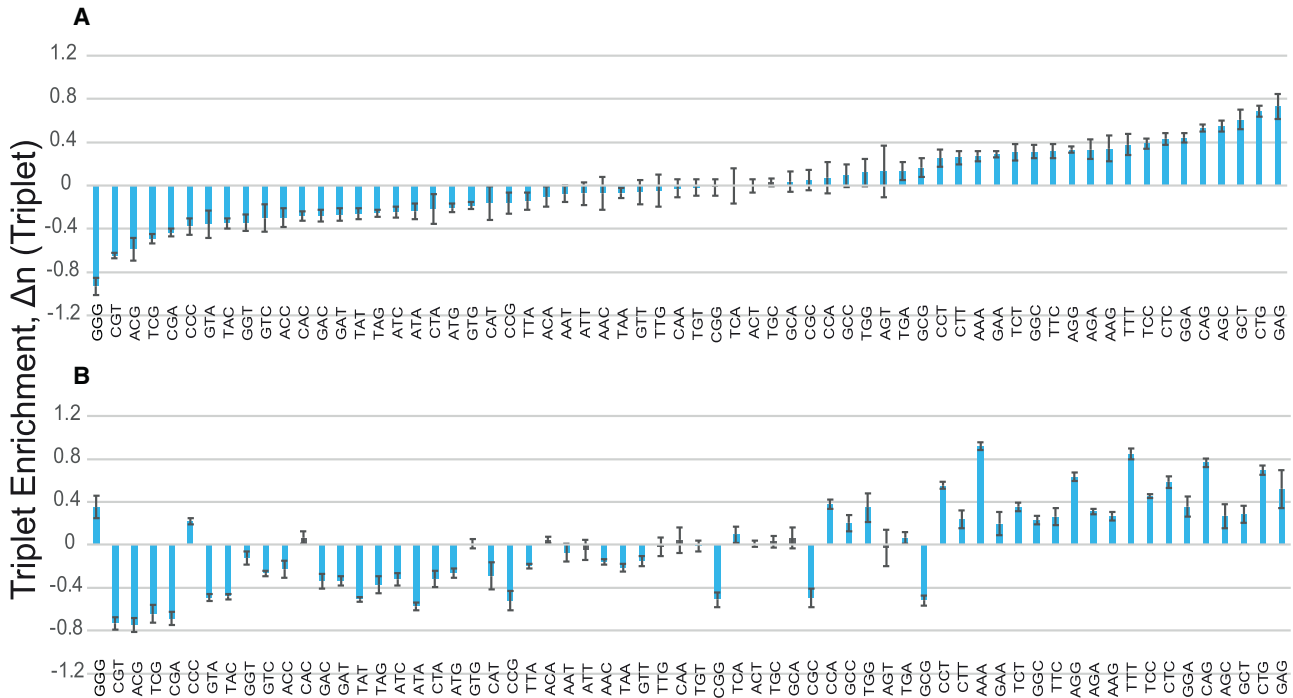

**FIGURE 2** Enrichment levels of 64 nucleotide triplets computed for the genomic regions characterized by high and low TFIIIB binding intensity, respectively. (A) Shown here is triplet enrichment in the region of high TFIIIB binding intensity (0, 100 bp). (B) Shown here is triplet enrichment in the region of low TFIIIB binding intensity (−450, −350 bp). The enrichment is defined as  $\Delta n = n - \langle n \rangle_{\text{rand}}$ , where *n* and  $\langle n \rangle_{\text{rand}}$  represent the computed average number of nucleotide triplets in the set of actual and randomized DNA sequences, respectively. We used 10 randomized DNA replicas to compute  $\langle n \rangle_{\text{rand}}$ . Shaded bars represent triplets that did not exhibit a significant difference based on the two-sample Kolmogorov-Smirnov *p* value (Table S1). To compute error bars, we divided DNA sequences into four randomly chosen subgroups and computed the mean value of the enrichment for each subgroup. The error bars are defined as 2 SD of the mean between the subgroups. To see this figure in color, go online.

is also a vector of length 64 with all but one zero elements. The only nonzero element ( $= 1$ ) of  $S_\alpha(j)$  corresponds to the nucleotide triplet of type  $\alpha$  located at the sequence position  $j$ . After generating 250 random TFs, and averaging the resulting free energy, as follows:

$$F = -k_B T \ln(Z), \quad (3)$$

with respect to all TFs, we obtain the average nonconsensus free energy for a given genomic position. Moving the sliding window along the genome, and repeating the procedure described above, we obtain the genomewide average nonconsensus free energy landscape (Fig. 1). This landscape demonstrates a statistically significant, negative correlation with the measured TFIIB binding preferences (Fig. 1, inset). The lower the nonconsensus free energy, the higher the measured TFIIB binding intensity. We have verified that the obtained results are similar for all three possible reading frames (Fig. S2). We note that in the free energy calculation from Eqs. 1 and 2, once the reading frame is chosen, the energy needs to be computed with the step size of three nucleotides (Fig. S1). This is due to the fact that our effective energy model is defined at the triplet level and is not decomposable into, e.g., mononucleotide contributions.

We stress the important fact that our random binder model does not involve any fitting parameters, and all the parameters,  $K_\alpha$ , in the interaction potential, Eq. 2, are entirely random (see above). In other words, in the course of computing the free energy (Fig. 1), our computational procedure does not utilize training and validation datasets, respectively.

Highly nonrandom distribution of repetitive nucleotide triplets along the human genomic DNA provides the reason for the observed effect (Fig. 2). In particular, we analyzed the enrichment level for 64 possible nucleotide triplets in the region of the highest TFIIB binding intensity positioned in the interval (0, 100), and compared this enrichment with the one observed in the interval distant from the TSS ( $-450, -350$ ) (Fig. 2). The computed triplet enrichment,  $\Delta n = n - \langle n \rangle_{\text{rand}}$ , is normalized by the GC content in each genomic region separately, and it thus represents a robust measure characterizing the enrichment of repetitive nucleotide triplet patterns. Here,  $n$  and  $\langle n \rangle_{\text{rand}}$  represent the computed average number of nucleotide triplets in the set of actual and randomized DNA sequences, respectively. We used 10 randomized DNA replicas to compute  $\langle n \rangle_{\text{rand}}$ .

To further validate statistical significance of our results, we computed the Kolmogorov-Smirnov  $p$  value for each nucleotide triplet (Table S1). This  $p$  value provides a statistical significance of the difference between the actual and randomized probability distributions,  $P(n)$  and  $P(n_{\text{rand}})$ , respectively (Table S1). For the genomic interval (0; 100), the majority (60 out of 64) of computed  $p$  values are highly significant (Fig. 2 A; Table S1). For example, the enrichment

of GAG triplet and the depletion of GGG triplet, provide the strongest signature for the enhanced TFIIB binding intensity (Fig. 2 A). The pattern of nucleotide triplet enrichment is entirely different for the interval ( $-350, -450$ ), with 54 out of 64 computed  $p$  values being significant (Fig. 2 B; Table S1).

We note that  $<30\%$  of the analyzed genes possess translation start sites within the region (0, 100) (Fig. S3). We performed a control calculation, removing these sequences from our analysis of the triplet enrichment (Fig. S4). As a result, we obtained highly significant linear correlation between the original (Fig. 2 A) and control (Fig. S4) triplet enrichment with the linear correlation coefficient ( $R = 0.99$ ). Therefore, the dominant effect to the observed triplet enrichment (depletion) (Fig. 2) does not originate from codon bias (Figs. S3 and S4).

The obtained pattern of nucleotide triplet enrichment (Fig. 2) is validated by the computed pair correlation function,  $\eta_{\alpha\alpha}(x)$ , representing the probability to find two nucleotides of type  $\alpha$  separated by the relative distance,  $x$  (Fig. 3). Taken together, our results indicate that the nonconsensus mechanism provides the DNA binding specificity for TFIIB, meaning that the entire distribution of enrichment/depletion levels for the majority of nucleotide triplets (and not just one or two specific triplets) influences the TFIIB binding intensity.

The peaks in the computed pair correlation functions (Fig. 3, C and D) demonstrate that certain repetitive DNA triplets represent statistically dominant repetitive sequence elements in the genomic regions characterized by high PIC occupancy (Fig. 2 A). To further validate this observation, we analyzed the enrichment (depletion) of doublets (16 possible nucleotide doublets) and quadruplets (256 possible nucleotide quadruplets) (Tables S2 and S3). We also computed the free energy landscape based on doublets (Fig. S5) and quadruplets (Fig. S6), using a variant of our simple random-binder model adopted for doublets and quadruplets, respectively (Figs. S5 and S6). Strikingly, although doublets and quadruplets do show statistically significant enrichment (depletion) (Tables S2 and S3), the computed free energy landscapes based on doublets and quadruplets, respectively, do not correlate with the measured binding preferences of PIC (Figs. S5 and S6). This is in striking contrast with the free energy landscape computed based on triplets (Fig. 1).

We emphasize that our simple approach does not take into account the effect of PIC competition (and its possible synergistic interactions) with other DNA binding proteins, or the effect of nucleosome binding preferences (4,11–13). Our analysis focuses entirely on the nonconsensus effect, whereas the presence of yet unidentified specific, consensus motifs might significantly influence the resulting binding preferences. However, our main prediction that nonconsensus PIC-DNA binding dominated by entropy significantly influences PIC binding preferences in the human

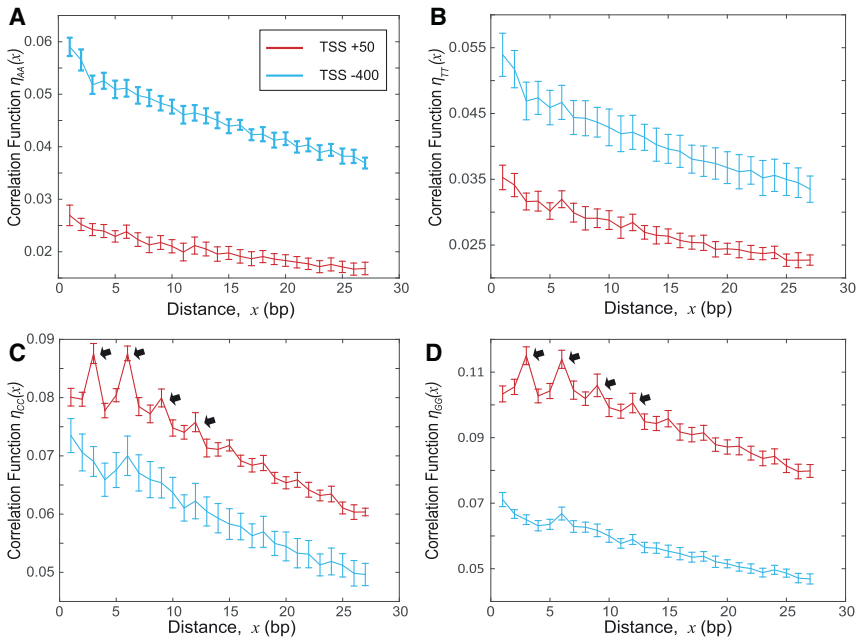

**FIGURE 3** Normalized pair (binary) correlation functions for the nucleotide spatial distribution. (A–D) Shown here is the computed correlation function  $\eta_{\alpha\alpha}(x) = (N_{\alpha\alpha}(x) - \langle N_{\alpha\alpha}(x) \rangle_{\text{rand}}) / L_0$ , where  $N_{\alpha\alpha}(x)$  represents the average number of nucleotide pairs of type  $\alpha$  separated by the relative distance  $x$  bp, and  $L_0$  is the width of the window. We used  $L_0 = 100$  bp. We used DNA sequences of 6097 genes for two genomic regions: the region of high TFIIB binding intensity (0, 100 bp) (red lines); and the region of low TFIIB binding intensity (–450, –350 bp) (blue lines). To compute error bars, we calculated the mean for each chromosome and divided the results into five randomly chosen subgroups and computed the mean for each subgroup. The error bars are defined as 1 SD of the mean between the subgroups. The arrows in (C) and (D) emphasize the peaks of the correlation function. These peaks represent the enrichment of repeated DNA triplets. To see this figure in color, go online.

genome most likely represents the general rule rather than the exception.

In summary, using a statistical mechanics model without any fitting parameters with a genomic DNA sequence constituting the only input, we reveal that the nonconsensus nucleotide triplet code constitutes a key signature providing PIC binding specificity in the human genome. Our results need to be further validated in the future, using direct in vitro methods for measuring TFIIB-DNA binding preferences. Such measurements, using purified proteins and DNA, will clarify the question of how much indirect protein-DNA and nucleosome binding influence our model predictions.

## SUPPORTING MATERIAL

Six figures and three tables are available at [http://www.biophysj.org/biophysj/supplemental/S0006-3495\(17\)30439-3](http://www.biophysj.org/biophysj/supplemental/S0006-3495(17)30439-3).

## AUTHOR CONTRIBUTIONS

M.G. and D.B.L. designed research, performed research, and wrote the paper.

## REFERENCES

- Berg, O. G., and P. H. von Hippel. 1987. Selection of DNA binding sites by regulatory proteins. Statistical-mechanical theory and application to operators and promoters. *J. Mol. Biol.* 193: 723–750.
- Stormo, G. D., and D. S. Fields. 1998. Specificity, free energy and information content in protein-DNA interactions. *Trends Biochem. Sci.* 23:109–113.
- van Heeringen, S. J., W. Akhtar, ..., G. J. Veenstra. 2011. Nucleotide composition-linked divergence of vertebrate core promoter architecture. *Genome Res.* 21:410–421.
- Lenhard, B., A. Sandelin, and P. Carninci. 2012. Metazoan promoters: emerging characteristics and insights into transcriptional regulation. *Nat. Rev. Genet.* 13:233–245.
- Fordyce, P. M., D. Gerber, ..., S. R. Quake. 2010. De novo identification and biophysical characterization of transcription-factor binding sites with microfluidic affinity analysis. *Nat. Biotechnol.* 28:970–975.
- Gordán, R., N. Shen, ..., M. L. Bulyk. 2013. Genomic regions flanking E-box binding sites influence DNA binding specificity of bHLH transcription factors through DNA shape. *Cell Reports.* 3:1093–1104.
- Pugh, B. F., and B. J. Venters. 2016. Genomic organization of human transcription initiation complexes. *PLoS One.* 11:e0149339.
- Afek, A., J. L. Schipper, ..., D. B. Lukatsky. 2014. Protein-DNA binding in the absence of specific base-pair recognition. *Proc. Natl. Acad. Sci. USA.* 111:17140–17145.
- Afek, A., and D. B. Lukatsky. 2013. Genome-wide organization of eukaryotic preinitiation complex is influenced by nonconsensus protein-DNA binding. *Biophys. J.* 104:1107–1115.
- Sela, I., and D. B. Lukatsky. 2011. DNA sequence correlations shape nonspecific transcription factor-DNA binding affinity. *Biophys. J.* 101:160–166.
- Beshnova, D. A., A. G. Cherstvy, ..., V. B. Teif. 2014. Regulation of the nucleosome repeat length in vivo by the DNA sequence, protein concentrations and long-range interactions. *PLOS Comput. Biol.* 10:e1003698.
- Teif, V. B., F. Erdel, ..., K. Rippe. 2013. Taking into account nucleosomes for predicting gene expression. *Methods.* 62:26–38.
- Trifonov, E. N. 2016. Transcription factors operate TATA switches via rotational remodeling of local columnar chromatin structure. *J. Biomol. Struct. Dyn.* 34:2741–2747.

**Biophysical Journal, Volume 112**

**Supplemental Information**

**Specificity-Determining DNA Triplet Code for Positioning of Human  
Preinitiation Complex**

**Matan Goldshtein and David B. Lukatsky**

## Supporting Material

### Supporting Figures

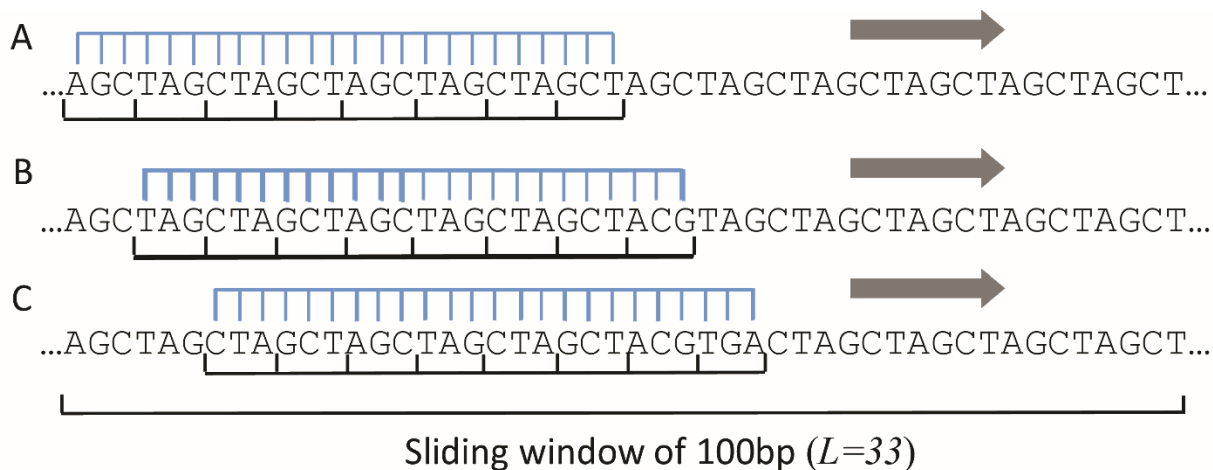

**FIGURE S1** Cartoon illustrating the calculation of the nonconsensus protein-DNA binding energies,  $U$ , as a model random binder slides along the sliding window. The interaction contacts of a model protein TF with all DNA nucleotide bases are depicted in blue. The corresponding nucleotide triplets are depicted in black below the DNA strand. In our model we used TF that forms 24 contacts with nucleotide bases (blue), which corresponds to  $M=8$  contacts with nucleotide triplets (black). Each model TF slides (gray arrow) along the DNA sequence by 3 bp steps. We used the sliding window with the width 100 bp, which corresponds to  $L=33$  nucleotide triplets. The following three examples illustrate the energy calculation as TF slides three consecutive steps along the sliding window: (A)  $U(1)=2K_{AGC}+2K_{TAG}+2K_{CTA}+2K_{GCT}$ ; (B)  $U(2)=2K_{TAG}+2K_{CTA}+2K_{GCT}+K_{AGC}+K_{ACG}$ ; (C)  $U(3)=2K_{CTA}+2K_{GCT}+K_{AGC}+K_{ACG}+K_{TAG}+K_{TGA}$ . The 64 random energy parameters  $K_{\alpha}$  are drawn from the Gaussian distribution with the zero mean and the standard deviation  $\sigma=2k_{\text{B}}T$ . These parameters uniquely define a given random binder. In all our calculations we used the free energy averaged over 250 random binders. Therefore, for each DNA sliding window, the procedure described above was repeated for all 250 random binders, each characterized by a different set of  $K_{\alpha}$ .

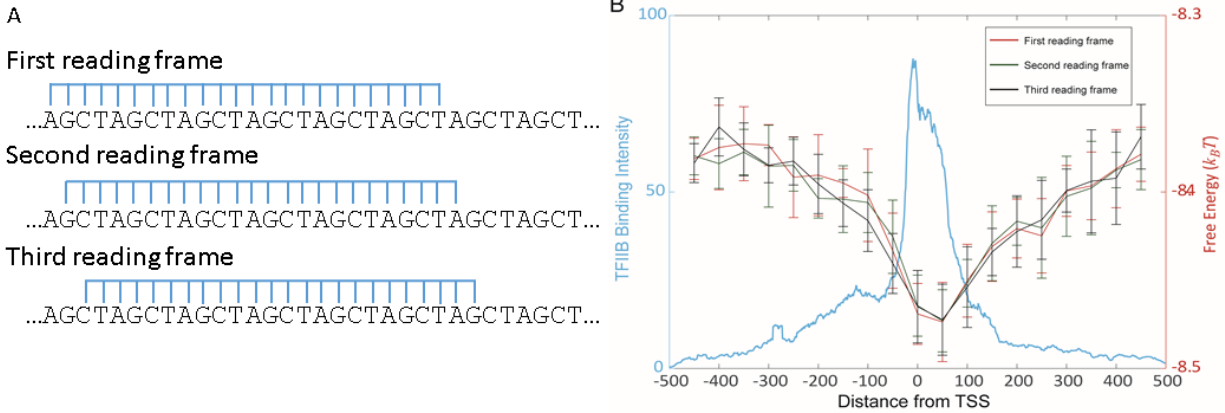

**FIGURE S2 Robustness of the nonconsensus protein-DNA binding free energy landscape computed for different DNA reading frames.** This figure is complementary to Fig. 1 of the main text, and all the definitions and the axes labels are identical to those defined in Fig. 1. (A) Three possible DNA reading frames for a sliding random binder are illustrated. (B) The average free energy of nonconsensus TFIIIB-DNA binding for all three possible DNA reading frames, and the measured profile of average TFIIIB occupancy around the TSSs of 6097 genes. For each reading frame, the average free energy was calculated every 50 bp, within the interval (-450 bp; 450 bp). The rest of the parameters are identical to those defined in Fig. 1 of the main text.

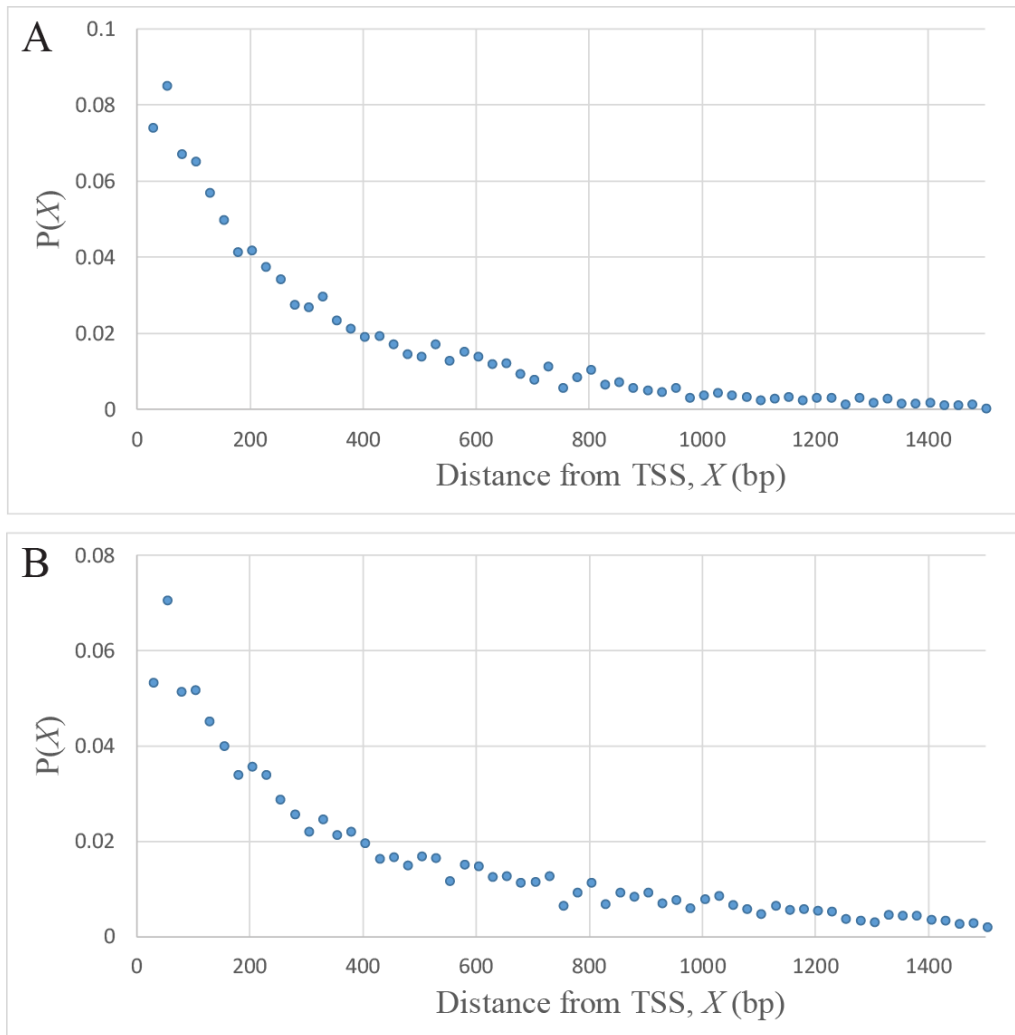

**FIGURE S3 Probability distribution of the Kozak translation start site consensus sequence as a function of the distance  $X$  after TSS for 6097 genes used in our analysis.** The Kozak sequence is the consensus sequence recognized by ribosomes to begin translation, gccRccATGG, where R represents a purine (i.e. A or G), and lower-case letters represent a lower significance parts of the consensus motif (M. Kozak, Nucl. Acid Res. 15(20), 8185 (1987)). (A) Probability distribution for the consensus sequence ATGG: 29% of the data falls within the first 100bp after the transcription start site (TSS); (B) Probability distribution for the consensus sequence RnnATGG: 22% of the data falls within the first 100bp after TSS.



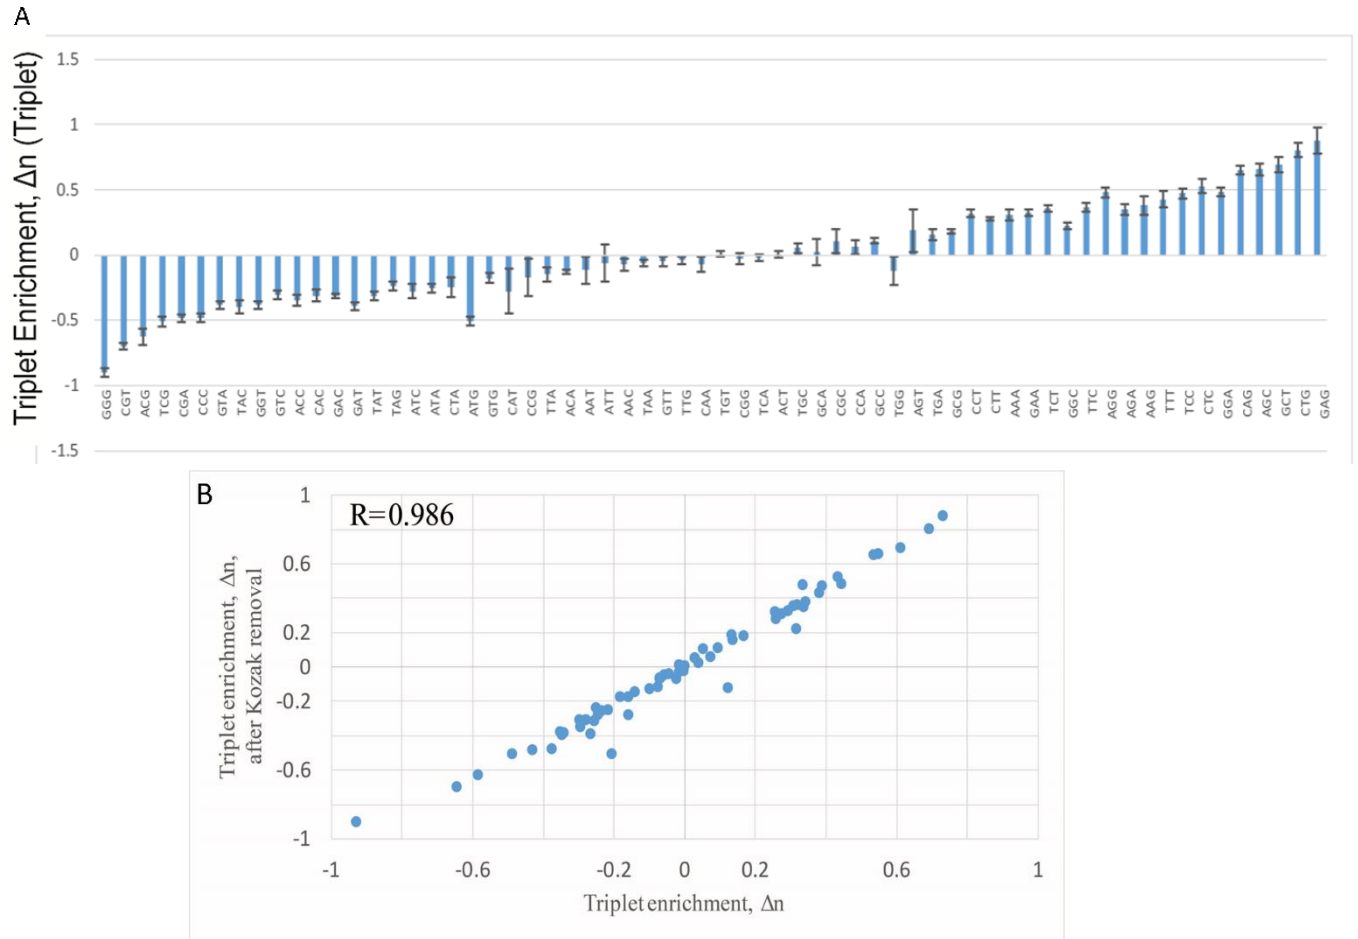

**FIGURE S4 Enrichment levels of 64 nucleotide triplets computed for the genomic regions characterized by high TFIIB binding intensity, after removal of sequences with Kozak translation start site consensus sequence.** (A) This figure is complementary to Fig. 2A of the main text. After removing DNA sequences containing the Kozak translation start site (see Fig. S3A), we are left with 4360 sequences (out of 6097 sequences used in Fig. 2A of the main text). The definition of the triplet enrichment  $\Delta n$  is identical to the one used in Fig. 2 of the main text. (B) The plot containing 64 points, representing the linear correlation between the triplet enrichment  $\Delta n$  with and without removing the Kozak sequences, respectively.

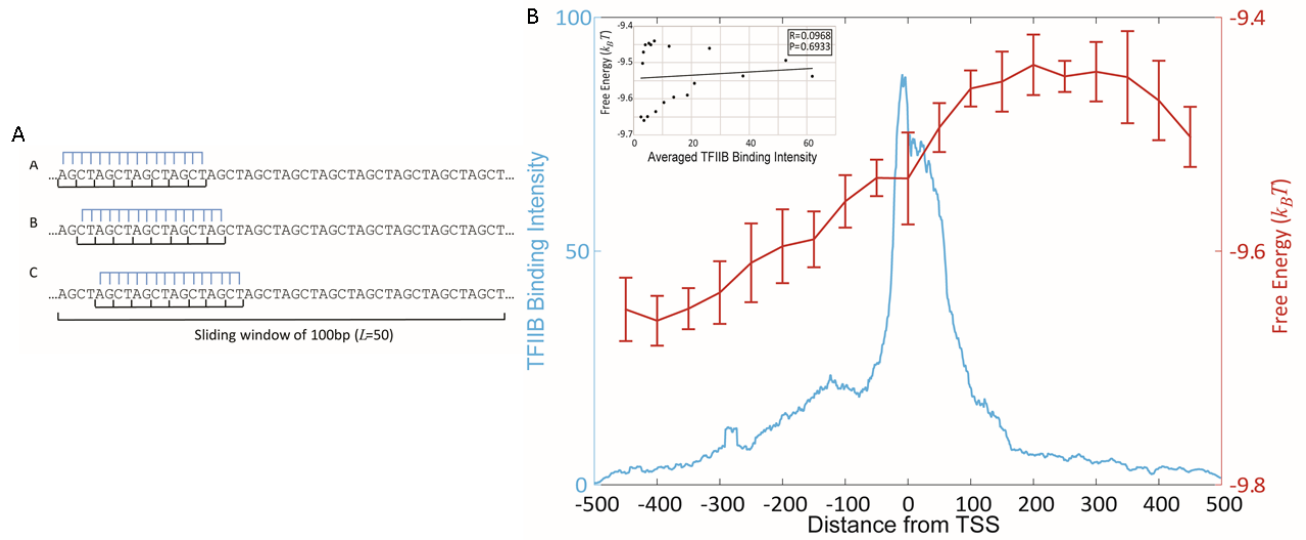

**FIGURE S5 Free energy of nonconsensus TFIIB-DNA binding based on doublets does not correlate with the TFIIB binding intensity.** The computed average free energy of nonconsensus TFIIB-DNA binding (using the model random binding interaction potential with all 16 possible nucleotide doublets) and the profile of the average TFIIB binding intensity measured around the TSSs of 6097 genes (see Fig. 1 of the main text). In order to compute the free energy, we used Eqs. (1-3), as described in the main text, with the index  $\alpha$  running over 16 possible nucleotide doublets (instead of 64 possible triplets used in the main text in order to compute the free energy). (A) Cartoon illustrating the calculation of the nonconsensus protein-DNA binding energies,  $U$ , as a model random binder slides along the sliding window for doublets. For example, the model protein-DNA binding energy for the first, top position,  $U(1)=4K_{AG}+4K_{CT}$ . Here all 16 possible energy parameters (for each model TF),  $K_\alpha$ , are drawn from the Gaussian distribution with the zero mean and the standard deviation,  $\sigma=2k_B T$ . (B) The average free energy was calculated every 50 bp, within the interval (-450 bp; 450 bp). In order to compute the free energy, we used a sliding window of 100 bp. To compute error bars, we calculated the mean free energy for each chromosome and divided the results into five randomly chosen subgroups and computed the mean for each subgroup. The error bars are defined as one standard deviation of mean free energy between the subgroups. (Inset) The correlation between the free energy and the TFIIB binding intensity with the Pearson correlation coefficient and the  $p$ -value.

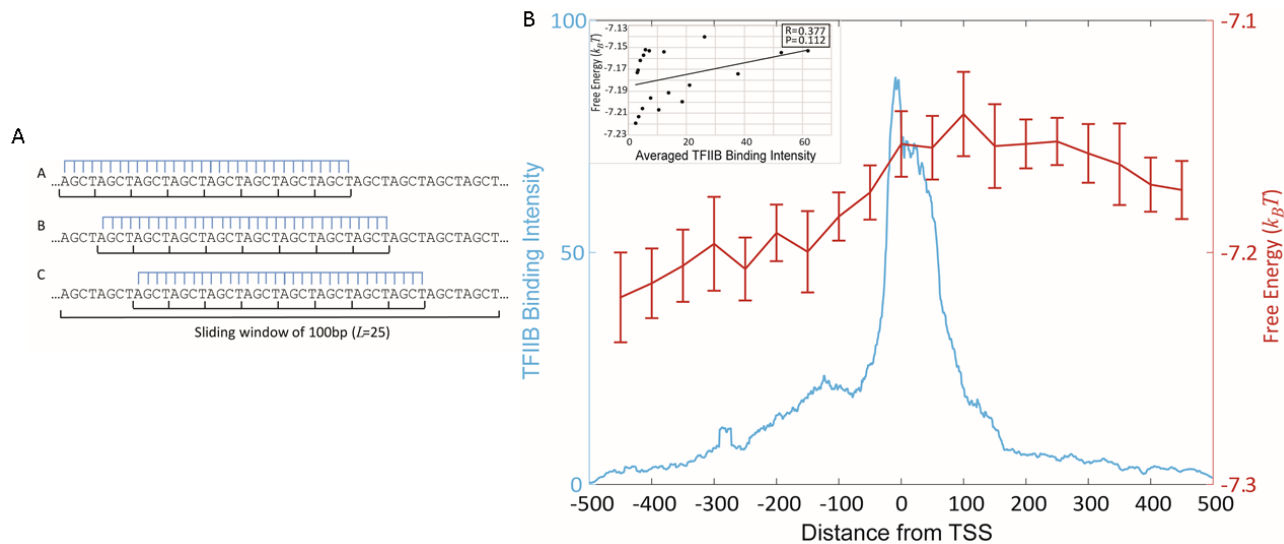

**FIGURE S6 Free energy of nonconsensus TFIIB-DNA binding based on quadruplets does not correlate with the TFIIB binding intensity.** The computed average free energy of nonconsensus TFIIB-DNA binding (using the model random binding interaction potential with all 256 possible nucleotide quadruplets) and the profile of the average TFIIB binding intensity measured around 6097 genes (see Fig. 1 of the main text). In order to compute the free energy, we used Eqs. (1-3), as described in the main text, with the index  $\alpha$  running over 256 possible nucleotide quadruplets (instead of 64 possible triplets used in the main text). (A) Cartoon illustrating the calculation of the nonconsensus protein-DNA binding energies,  $U$ , as a model random binder slides along the sliding window for doublets. For example, the model protein-DNA binding energy for the first, top position,  $U(1)=8K_{AGCT}$ . Here all 256 possible energy parameters (for each model TF),  $K_\alpha$ , are drawn from the Gaussian distribution with the zero mean and the standard deviation,  $\sigma=2k_B T$ . (B) The average free energy was calculated every 50 bp, within the interval (-450 bp; 450 bp). In order to compute the free energy, we used a sliding window of 100 bp. To compute error bars, we calculated the mean free energy for each chromosome and divided the results into five randomly chosen subgroups and computed the mean for each subgroup. The error bars are defined as one standard deviation of mean free energy between the subgroups. (Inset) The correlation between the free energy and the TFIIB binding intensity with the Pearson correlation coefficient and the  $p$ -value.

### Supporting Tables

|     | Mean [0;100] | Mean [0;100] Rand | KS-test | P-Value   | $\Delta$ (Mean [0;100]-Mean [0;100] rand) | Mean [-450;-350] | Mean [-450;-350] Rand | KS-test | P-Value  | $\Delta$ (Mean [-450;-350]-Mean[-450;-350] rand) |
|-----|--------------|-------------------|---------|-----------|-------------------------------------------|------------------|-----------------------|---------|----------|--------------------------------------------------|
| AAA | 0.818        | 0.547             | 1       | 3.194E-44 | 0.272                                     | 2.607            | 1.689                 | 1       | 1.06E-66 | 0.918                                            |
| AAC | 0.670        | 0.743             | 1       | 5.95E-11  | -0.072                                    | 1.258            | 1.417                 | 1       | 1.46E-14 | -0.159                                           |
| AAG | 1.292        | 0.951             | 1       | 2.048E-65 | 0.341                                     | 1.744            | 1.476                 | 1       | 1.55E-30 | 0.268                                            |
| AAT | 0.439        | 0.516             | 1       | 3.259E-12 | -0.077                                    | 1.357            | 1.431                 | 1       | 0.01854  | -0.074                                           |
| ACA | 0.642        | 0.743             | 1       | 3.675E-23 | -0.102                                    | 1.469            | 1.423                 | 0       | 0.387044 | 0.046                                            |
| ACC | 1.062        | 1.358             | 1       | 3.673E-57 | -0.296                                    | 1.379            | 1.610                 | 1       | 7.52E-30 | -0.231                                           |

|     |       |       |   |           |        |       |       |   |          |        |
|-----|-------|-------|---|-----------|--------|-------|-------|---|----------|--------|
| ACG | 0.903 | 1.490 | 1 | 1.66E-268 | -0.588 | 0.768 | 1.515 | 1 | 0        | -0.747 |
| ACT | 0.822 | 0.825 | 0 | 0.4344062 | -0.003 | 1.325 | 1.315 | 0 | 0.291719 | 0.010  |
| AGA | 1.287 | 0.952 | 1 | 1.194E-64 | 0.334  | 1.789 | 1.478 | 1 | 7.42E-36 | 0.312  |
| AGC | 2.165 | 1.618 | 1 | 2.61E-123 | 0.547  | 1.793 | 1.524 | 1 | 2.01E-32 | 0.269  |
| AGG | 2.311 | 1.979 | 1 | 9.101E-42 | 0.333  | 2.260 | 1.626 | 1 | 3.3E-122 | 0.634  |
| AGT | 1.100 | 0.970 | 1 | 2.385E-12 | 0.131  | 1.252 | 1.281 | 0 | 0.502634 | -0.029 |
| ATA | 0.258 | 0.494 | 1 | 9.72E-125 | -0.236 | 0.860 | 1.433 | 1 | 4.4E-193 | -0.574 |
| ATC | 0.557 | 0.803 | 1 | 1.631E-97 | -0.246 | 0.994 | 1.314 | 1 | 9.88E-59 | -0.320 |
| ATG | 0.728 | 0.936 | 1 | 1.745E-39 | -0.207 | 1.021 | 1.287 | 1 | 1.49E-57 | -0.266 |
| ATT | 0.516 | 0.590 | 1 | 6.57E-14  | -0.073 | 1.332 | 1.378 | 0 | 0.231387 | -0.047 |
| CAA | 0.730 | 0.755 | 1 | 4.105E-05 | -0.026 | 1.470 | 1.427 | 0 | 0.118211 | 0.044  |
| CAC | 1.074 | 1.356 | 1 | 1.165E-59 | -0.282 | 1.676 | 1.611 | 0 | 0.059437 | 0.065  |
| CAG | 2.155 | 1.623 | 1 | 8.87E-117 | 0.532  | 2.284 | 1.518 | 1 | 2.1E-226 | 0.766  |
| CAT | 0.651 | 0.813 | 1 | 2.143E-36 | -0.162 | 1.024 | 1.314 | 1 | 1.38E-61 | -0.290 |
| CCA | 1.473 | 1.401 | 1 | 0.0024857 | 0.071  | 1.995 | 1.616 | 1 | 3.09E-62 | 0.379  |
| CCC | 2.778 | 3.157 | 1 | 1.899E-12 | -0.378 | 2.719 | 2.497 | 1 | 3.48E-21 | 0.222  |
| CCG | 3.131 | 3.293 | 1 | 5.144E-16 | -0.162 | 1.618 | 2.138 | 1 | 1.1E-96  | -0.520 |
| CCT | 1.976 | 1.722 | 1 | 1.337E-24 | 0.254  | 2.176 | 1.622 | 1 | 7.19E-91 | 0.554  |
| CGA | 1.078 | 1.510 | 1 | 1.27E-139 | -0.432 | 0.827 | 1.513 | 1 | 5.1E-285 | -0.687 |
| CGC | 3.362 | 3.311 | 1 | 3.612E-09 | 0.051  | 1.641 | 2.139 | 1 | 1.68E-91 | -0.498 |
| CGG | 3.790 | 3.808 | 1 | 5.945E-11 | -0.018 | 1.558 | 2.070 | 1 | 3.3E-101 | -0.512 |
| CGT | 1.088 | 1.736 | 1 | 9.85E-294 | -0.647 | 0.708 | 1.445 | 1 | 0        | -0.737 |
| CTA | 0.580 | 0.798 | 1 | 4.591E-72 | -0.218 | 0.992 | 1.309 | 1 | 2.15E-59 | -0.318 |
| CTC | 2.177 | 1.746 | 1 | 2.384E-59 | 0.431  | 2.207 | 1.622 | 1 | 6.22E-94 | 0.585  |
| CTG | 2.579 | 1.890 | 1 | 1.34E-192 | 0.689  | 2.149 | 1.453 | 1 | 5E-199   | 0.697  |
| CTT | 1.331 | 1.074 | 1 | 2.199E-35 | 0.257  | 1.612 | 1.374 | 1 | 5.86E-29 | 0.238  |
| GAA | 1.230 | 0.941 | 1 | 1.228E-54 | 0.289  | 1.671 | 1.473 | 1 | 2.72E-17 | 0.197  |
| GAC | 1.253 | 1.534 | 1 | 1.396E-51 | -0.281 | 1.177 | 1.516 | 1 | 4.38E-71 | -0.340 |
| GAG | 2.750 | 2.021 | 1 | 9.79E-139 | 0.729  | 2.154 | 1.632 | 1 | 1.14E-58 | 0.522  |
| GAT | 0.659 | 0.927 | 1 | 1.163E-84 | -0.268 | 0.943 | 1.279 | 1 | 7.86E-70 | -0.336 |
| GCA | 1.602 | 1.564 | 0 | 0.6949699 | 0.037  | 1.579 | 1.514 | 0 | 0.11215  | 0.064  |
| GCC | 3.419 | 3.327 | 1 | 0.0223591 | 0.092  | 2.345 | 2.142 | 1 | 5.91E-14 | 0.203  |
| GCG | 4.002 | 3.836 | 1 | 4.071E-11 | 0.166  | 1.560 | 2.078 | 1 | 2E-117   | -0.518 |
| GCT | 2.477 | 1.868 | 1 | 1.51E-146 | 0.609  | 1.731 | 1.449 | 1 | 1.67E-32 | 0.283  |
| GGA | 2.427 | 1.987 | 1 | 1.482E-63 | 0.440  | 1.976 | 1.618 | 1 | 9.82E-56 | 0.358  |
| GGC | 4.173 | 3.860 | 1 | 7.107E-15 | 0.314  | 2.307 | 2.079 | 1 | 1.86E-13 | 0.228  |
| GGG | 3.781 | 4.712 | 1 | 2.321E-57 | -0.931 | 2.646 | 2.293 | 1 | 1.25E-35 | 0.352  |
| GGT | 1.729 | 2.073 | 1 | 5.782E-64 | -0.344 | 1.325 | 1.446 | 1 | 9.42E-09 | -0.122 |
| GTA | 0.561 | 0.916 | 1 | 1.87E-163 | -0.354 | 0.789 | 1.281 | 1 | 8.8E-171 | -0.492 |
| GTC | 1.465 | 1.766 | 1 | 5.475E-64 | -0.301 | 1.172 | 1.439 | 1 | 6.5E-44  | -0.267 |
| GTG | 1.912 | 2.097 | 1 | 5.428E-22 | -0.186 | 1.454 | 1.442 | 0 | 0.143382 | 0.012  |
| GTT | 1.093 | 1.153 | 1 | 0.0061886 | -0.060 | 1.132 | 1.284 | 1 | 2.49E-15 | -0.152 |
| TAA | 0.443 | 0.514 | 1 | 4.087E-09 | -0.070 | 1.209 | 1.423 | 1 | 1.38E-21 | -0.214 |
| TAC | 0.436 | 0.786 | 1 | 7.4E-203  | -0.350 | 0.834 | 1.318 | 1 | 1.4E-142 | -0.484 |

|     |       |       |   |           |        |       |       |   |          |        |
|-----|-------|-------|---|-----------|--------|-------|-------|---|----------|--------|
| TAG | 0.670 | 0.924 | 1 | 1.065E-76 | -0.254 | 0.911 | 1.284 | 1 | 4.71E-92 | -0.373 |
| TAT | 0.309 | 0.567 | 1 | 6.44E-127 | -0.258 | 0.876 | 1.386 | 1 | 5.8E-150 | -0.509 |
| TCA | 0.830 | 0.834 | 0 | 0.2012681 | -0.004 | 1.409 | 1.315 | 1 | 1.28E-05 | 0.094  |
| TCC | 2.117 | 1.731 | 1 | 8.48E-56  | 0.386  | 2.077 | 1.624 | 1 | 1.74E-71 | 0.453  |
| TCG | 1.254 | 1.743 | 1 | 1.08E-164 | -0.490 | 0.795 | 1.438 | 1 | 5E-259   | -0.644 |
| TCT | 1.402 | 1.094 | 1 | 2.304E-45 | 0.307  | 1.726 | 1.372 | 1 | 2.02E-50 | 0.354  |
| TGA | 1.106 | 0.974 | 1 | 2.102E-13 | 0.133  | 1.355 | 1.290 | 1 | 0.007369 | 0.065  |
| TGC | 1.836 | 1.809 | 0 | 0.2064999 | 0.027  | 1.475 | 1.446 | 0 | 0.184563 | 0.029  |
| TGG | 2.255 | 2.134 | 1 | 4.946E-08 | 0.121  | 1.795 | 1.448 | 1 | 4.98E-51 | 0.347  |
| TGT | 1.138 | 1.156 | 1 | 0.0225222 | -0.018 | 1.262 | 1.274 | 1 | 0.004641 | -0.012 |
| TTA | 0.438 | 0.580 | 1 | 1.268E-36 | -0.143 | 1.187 | 1.387 | 1 | 1.09E-15 | -0.200 |
| TTC | 1.403 | 1.087 | 1 | 4.787E-59 | 0.316  | 1.636 | 1.374 | 1 | 8.9E-32  | 0.262  |
| TTG | 1.104 | 1.151 | 1 | 0.000423  | -0.047 | 1.256 | 1.276 | 0 | 0.848099 | -0.020 |
| TTT | 1.203 | 0.824 | 1 | 4.301E-54 | 0.378  | 2.344 | 1.496 | 1 | 6.85E-71 | 0.848  |

**TABLE S1** This table is complementary to Fig. 2 of the main text. It provides the two-sample Kolmogorov–Smirnov  $p$ -values for the statistical significance of the enrichment levels for all 64 nucleotide triplets. Triplets colored in yellow did not show significant enrichment or depletion at [0;100], triplets colored in blue did not show significant enrichment or depletion at [-450;-350], triplets colored in green did not show significant enrichment or depletion at both [0;100] and [-450;-350].

|    | Mean [0;100] | Mean [0;100] Rand | KS-test | P-Value   | $\Delta$ (Mean [0;100]-Mean [0;100] rand) | Mean [-450;-350] | Mean [-450;-350] Rand | KS-test | P-Value   | $\Delta$ (Mean [-450;-350]-Mean[-450;-350] rand) |
|----|--------------|-------------------|---------|-----------|-------------------------------------------|------------------|-----------------------|---------|-----------|--------------------------------------------------|
| AA | 3.254        | 2.703             | 1       | 1.72E-35  | 0.551                                     | 6.796            | 5.728                 | 1       | 1.19E-38  | 1.068                                            |
| AC | 3.465        | 4.501             | 1       | 8.25E-197 | -1.04                                     | 4.945            | 5.825                 | 1       | 8.82E-125 | -0.88                                            |
| AG | 6.934        | 5.332             | 1       | 5.40E-260 | 1.602                                     | 7.18             | 5.815                 | 1       | 1.69E-189 | 1.365                                            |
| AT | 2.079        | 2.886             | 1       | 2.58E-128 | -0.81                                     | 4.045            | 5.13                  | 1       | 5.94E-108 | -1.084                                           |
| CA | 4.657        | 4.484             | 1       | 8.91E-05  | 0.173                                     | 6.462            | 5.833                 | 1       | 1.24E-49  | 0.629                                            |
| CC | 9.46         | 9.476             | 0       | 0.904168  | -0.02                                     | 8.984            | 8.125                 | 1       | 5.79E-31  | 0.859                                            |
| CG | 9.408        | 10.35             | 1       | 3.33E-55  | -0.94                                     | 5.106            | 7.374                 | 1       | 0         | -2.268                                           |
| CT | 6.731        | 5.332             | 1       | 1.81E-189 | 1.4                                       | 7.004            | 5.669                 | 1       | 5.97E-185 | 1.335                                            |
| GA | 5.958        | 5.335             | 1       | 1.61E-40  | 0.622                                     | 5.993            | 5.816                 | 1       | 0.040686  | 0.177                                            |
| GC | 11.61        | 10.34             | 1       | 1.07E-92  | 1.27                                      | 7.576            | 7.383                 | 0       | 0.090044  | 0.193                                            |
| GG | 12.23        | 12.53             | 1       | 0.00061   | -0.3                                      | 8.52             | 7.594                 | 1       | 5.66E-40  | 0.925                                            |
| GT | 5.087        | 5.97              | 1       | 6.45E-102 | -0.88                                     | 4.58             | 5.343                 | 1       | 2.09E-100 | -0.763                                           |
| TA | 1.877        | 2.9               | 1       | 8.01E-208 | -1.02                                     | 3.703            | 5.117                 | 1       | 1.09E-186 | -1.414                                           |
| TC | 5.655        | 5.325             | 1       | 3.19E-10  | 0.33                                      | 6.075            | 5.688                 | 1       | 5.34E-15  | 0.388                                            |
| TG | 6.402        | 5.96              | 1       | 1.95E-19  | 0.442                                     | 5.875            | 5.35                  | 1       | 9.20E-36  | 0.525                                            |
| TT | 4.19         | 3.569             | 1       | 4.36E-28  | 0.621                                     | 6.157            | 5.212                 | 1       | 5.49E-33  | 0.944                                            |

**TABLE S2 This table is complementary to Fig. S5 of Supplemental Information. It provides the two-sample Kolmogorov–Smirnov  $p$ -values for the statistical significance of the enrichment levels for all 16 nucleotide doublets. Doubles colored in yellow did not show significant enrichment or depletion at [0;100], doublets colored in blue did not show significant enrichment or depletion at [-450;-350], doublets colored in green did not show significant enrichment or depletion at both [0;100] and [-450;-350]. In particular, in the interval [0;100], 15 out of 16 doublets showed a significant enrichment/depletion. In the interval [-450; -350], 15 out of 16 doublets showed a significant enrichment/depletion.**

|      | Mean [0;100] | Mean [0;100] Rand | KS-test | P-Value   | $\Delta$ (Mean [0;100]-Mean [0;100] rand) | Mean [-450;-350] | Mean [-450;-350] Rand | KS-test | P-Value   | $\Delta$ (Mean [-450;-350]-Mean[-450;-350] rand) |
|------|--------------|-------------------|---------|-----------|-------------------------------------------|------------------|-----------------------|---------|-----------|--------------------------------------------------|
| AAAA | 0.221        | 0.119             | 1       | 2.32E-16  | 0.102                                     | 0.987            | 0.473                 | 1       | 4.37E-55  | 0.514                                            |
| AAAC | 0.173        | 0.143             | 1       | 0.0004303 | 0.030                                     | 0.419            | 0.359                 | 1       | 6.36E-06  | 0.060                                            |
| AAAG | 0.281        | 0.183             | 1       | 2.43E-34  | 0.098                                     | 0.559            | 0.381                 | 1       | 6.25E-52  | 0.178                                            |
| AAAT | 0.134        | 0.111             | 1       | 0.0010087 | 0.023                                     | 0.5              | 0.373                 | 1       | 3.38E-19  | 0.127                                            |
| AACA | 0.146        | 0.142             | 0       | 1         | 0.004                                     | 0.367            | 0.358                 | 0       | 0.985359  | 0.009                                            |
| AACC | 0.203        | 0.226             | 0       | 0.3874321 | -0.023                                    | 0.348            | 0.367                 | 0       | 0.361213  | -0.019                                           |
| AACG | 0.154        | 0.261             | 1       | 9.20E-32  | -0.107                                    | 0.183            | 0.348                 | 1       | 8.77E-78  | -0.165                                           |
| AACT | 0.16         | 0.153             | 0       | 0.2207591 | 0.008                                     | 0.333            | 0.311                 | 0       | 0.079623  | 0.021                                            |
| AAGA | 0.292        | 0.18              | 1       | 2.83E-40  | 0.112                                     | 0.452            | 0.377                 | 1       | 8.77E-13  | 0.075                                            |
| AAGC | 0.351        | 0.254             | 1       | 1.21E-26  | 0.097                                     | 0.408            | 0.352                 | 1       | 1.10E-08  | 0.055                                            |
| AAGG | 0.408        | 0.327             | 1       | 1.28E-14  | 0.081                                     | 0.492            | 0.385                 | 1       | 7.30E-21  | 0.106                                            |
| AAGT | 0.228        | 0.177             | 1       | 3.38E-12  | 0.050                                     | 0.349            | 0.313                 | 1       | 0.009745  | 0.036                                            |
| AATA | 0.075        | 0.109             | 1       | 0.0028256 | -0.035                                    | 0.311            | 0.372                 | 1       | 2.41E-10  | -0.061                                           |
| AATC | 0.121        | 0.143             | 0       | 0.0680461 | -0.023                                    | 0.281            | 0.315                 | 1       | 7.23E-05  | -0.034                                           |
| AATG | 0.143        | 0.176             | 1       | 0.0426714 | -0.033                                    | 0.313            | 0.312                 | 0       | 0.765907  | 0.000                                            |
| AATT | 0.097        | 0.128             | 0       | 0.2032548 | -0.031                                    | 0.355            | 0.34                  | 0       | 0.530452  | 0.015                                            |
| ACAA | 0.127        | 0.15              | 0       | 0.3516819 | -0.023                                    | 0.342            | 0.355                 | 0       | 0.219633  | -0.012                                           |
| ACAC | 0.153        | 0.224             | 1       | 9.48E-21  | -0.071                                    | 0.337            | 0.363                 | 1       | 4.96E-10  | -0.026                                           |
| ACAG | 0.258        | 0.265             | 0       | 1         | -0.008                                    | 0.463            | 0.35                  | 1       | 1.03E-32  | 0.113                                            |
| ACAT | 0.098        | 0.15              | 1       | 3.33E-07  | -0.051                                    | 0.242            | 0.31                  | 1       | 5.13E-15  | -0.068                                           |
| ACCA | 0.185        | 0.223             | 1       | 0.0002353 | -0.038                                    | 0.334            | 0.369                 | 1       | 0.000256  | -0.035                                           |
| ACCC | 0.34         | 0.433             | 1       | 6.80E-21  | -0.094                                    | 0.456            | 0.495                 | 1       | 0.002679  | -0.039                                           |
| ACCG | 0.292        | 0.478             | 1       | 9.18E-82  | -0.186                                    | 0.243            | 0.435                 | 1       | 2.06E-92  | -0.192                                           |
| ACCT | 0.232        | 0.248             | 0       | 0.6791332 | -0.016                                    | 0.368            | 0.342                 | 1       | 0.021324  | 0.026                                            |
| ACGA | 0.121        | 0.26              | 1       | 2.89E-57  | -0.139                                    | 0.152            | 0.354                 | 1       | 2.59E-113 | -0.202                                           |
| ACGC | 0.32         | 0.473             | 1       | 5.71E-63  | -0.153                                    | 0.248            | 0.433                 | 1       | 3.39E-90  | -0.184                                           |
| ACGG | 0.295        | 0.555             | 1       | 8.88E-143 | -0.259                                    | 0.222            | 0.424                 | 1       | 5.63E-103 | -0.202                                           |
| ACGT | 0.158        | 0.275             | 1       | 1.18E-41  | -0.117                                    | 0.155            | 0.318                 | 1       | 8.22E-84  | -0.164                                           |
| ACTA | 0.089        | 0.147             | 1       | 1.30E-10  | -0.058                                    | 0.202            | 0.311                 | 1       | 2.28E-31  | -0.109                                           |

|      |       |       |   |           |        |       |       |   |           |        |
|------|-------|-------|---|-----------|--------|-------|-------|---|-----------|--------|
| ACTC | 0.235 | 0.245 | 0 | 0.3580176 | -0.011 | 0.382 | 0.341 | 1 | 8.22E-06  | 0.041  |
| ACTG | 0.298 | 0.267 | 0 | 0.1819288 | 0.031  | 0.381 | 0.32  | 1 | 2.33E-09  | 0.061  |
| ACTT | 0.191 | 0.171 | 1 | 0.0107202 | 0.020  | 0.319 | 0.306 | 0 | 0.296602  | 0.013  |
| AGAA | 0.29  | 0.18  | 1 | 2.67E-34  | 0.110  | 0.518 | 0.381 | 1 | 3.97E-29  | 0.137  |
| AGAC | 0.262 | 0.254 | 0 | 0.9948072 | 0.009  | 0.357 | 0.355 | 0 | 0.792859  | 0.002  |
| AGAG | 0.531 | 0.342 | 1 | 3.08E-64  | 0.189  | 0.591 | 0.379 | 1 | 4.68E-64  | 0.212  |
| AGAT | 0.188 | 0.186 | 1 | 0.0035506 | 0.002  | 0.28  | 0.307 | 1 | 0.035946  | -0.028 |
| AGCA | 0.343 | 0.259 | 1 | 9.92E-16  | 0.084  | 0.415 | 0.351 | 1 | 3.03E-07  | 0.064  |
| AGCC | 0.656 | 0.467 | 1 | 3.90E-45  | 0.190  | 0.614 | 0.436 | 1 | 4.41E-50  | 0.177  |
| AGCG | 0.669 | 0.553 | 1 | 5.64E-10  | 0.116  | 0.341 | 0.431 | 1 | 1.10E-25  | -0.090 |
| AGCT | 0.476 | 0.268 | 1 | 3.77E-92  | 0.208  | 0.448 | 0.313 | 1 | 5.55E-43  | 0.135  |
| AGGA | 0.527 | 0.338 | 1 | 5.25E-58  | 0.189  | 0.577 | 0.382 | 1 | 3.49E-66  | 0.195  |
| AGGC | 0.723 | 0.547 | 1 | 8.60E-33  | 0.176  | 0.648 | 0.433 | 1 | 1.53E-72  | 0.216  |
| AGGG | 0.681 | 0.736 | 0 | 0.1305816 | -0.055 | 0.645 | 0.485 | 1 | 1.06E-26  | 0.160  |
| AGGT | 0.355 | 0.328 | 0 | 0.3108584 | 0.027  | 0.371 | 0.326 | 1 | 8.33E-07  | 0.045  |
| AGTA | 0.118 | 0.168 | 1 | 1.26E-07  | -0.050 | 0.233 | 0.313 | 1 | 2.32E-16  | -0.080 |
| AGTC | 0.316 | 0.28  | 1 | 5.83E-06  | 0.036  | 0.302 | 0.313 | 0 | 0.846948  | -0.012 |
| AGTG | 0.397 | 0.345 | 1 | 8.16E-09  | 0.052  | 0.381 | 0.322 | 1 | 1.95E-06  | 0.059  |
| AGTT | 0.256 | 0.197 | 1 | 1.04E-12  | 0.059  | 0.312 | 0.29  | 0 | 0.257892  | 0.022  |
| ATAA | 0.081 | 0.11  | 0 | 0.1218812 | -0.029 | 0.281 | 0.373 | 1 | 2.80E-20  | -0.092 |
| ATAC | 0.048 | 0.149 | 1 | 1.03E-32  | -0.101 | 0.16  | 0.311 | 1 | 1.35E-71  | -0.150 |
| ATAG | 0.067 | 0.176 | 1 | 1.44E-34  | -0.109 | 0.159 | 0.309 | 1 | 6.77E-65  | -0.150 |
| ATAT | 0.058 | 0.118 | 1 | 1.01E-08  | -0.060 | 0.212 | 0.34  | 1 | 1.26E-42  | -0.128 |
| ATCA | 0.096 | 0.149 | 1 | 1.16E-08  | -0.053 | 0.227 | 0.311 | 1 | 1.48E-20  | -0.084 |
| ATCC | 0.191 | 0.238 | 1 | 2.13E-11  | -0.047 | 0.314 | 0.342 | 0 | 0.28965   | -0.028 |
| ATCG | 0.114 | 0.275 | 1 | 2.14E-83  | -0.161 | 0.131 | 0.312 | 1 | 4.29E-108 | -0.181 |
| ATCT | 0.15  | 0.168 | 0 | 0.2358064 | -0.018 | 0.282 | 0.305 | 0 | 0.112337  | -0.023 |
| ATGA | 0.118 | 0.173 | 1 | 3.73E-08  | -0.055 | 0.24  | 0.313 | 1 | 2.16E-15  | -0.074 |
| ATGC | 0.153 | 0.279 | 1 | 1.30E-46  | -0.127 | 0.22  | 0.313 | 1 | 1.96E-26  | -0.093 |
| ATGG | 0.329 | 0.322 | 0 | 0.9905053 | 0.006  | 0.272 | 0.317 | 1 | 6.28E-06  | -0.045 |
| ATGT | 0.123 | 0.196 | 1 | 3.85E-14  | -0.074 | 0.23  | 0.29  | 1 | 1.13E-13  | -0.059 |
| ATTA | 0.066 | 0.117 | 1 | 1.40E-08  | -0.051 | 0.278 | 0.336 | 1 | 2.35E-05  | -0.057 |
| ATTC | 0.13  | 0.178 | 1 | 9.28E-06  | -0.048 | 0.278 | 0.304 | 1 | 0.024503  | -0.026 |
| ATTG | 0.145 | 0.188 | 1 | 1.52E-06  | -0.043 | 0.198 | 0.293 | 1 | 9.73E-29  | -0.094 |
| ATTT | 0.17  | 0.142 | 1 | 3.40E-05  | 0.027  | 0.482 | 0.345 | 1 | 6.38E-25  | 0.137  |
| CAAA | 0.167 | 0.145 | 1 | 0.0108053 | 0.023  | 0.491 | 0.358 | 1 | 3.00E-30  | 0.133  |
| CAAC | 0.17  | 0.228 | 1 | 5.68E-08  | -0.058 | 0.286 | 0.363 | 1 | 2.39E-15  | -0.077 |
| CAAG | 0.279 | 0.257 | 0 | 0.2952025 | 0.023  | 0.412 | 0.352 | 1 | 1.28E-08  | 0.060  |
| CAAT | 0.106 | 0.155 | 1 | 2.83E-05  | -0.049 | 0.226 | 0.311 | 1 | 1.56E-22  | -0.085 |
| CACA | 0.198 | 0.237 | 1 | 0.0001909 | -0.038 | 0.429 | 0.362 | 1 | 0.046583  | 0.067  |
| CACC | 0.357 | 0.439 | 1 | 3.05E-16  | -0.082 | 0.522 | 0.489 | 0 | 0.109726  | 0.033  |

|      |       |       |   |           |        |       |       |   |           |        |
|------|-------|-------|---|-----------|--------|-------|-------|---|-----------|--------|
| CACG | 0.255 | 0.464 | 1 | 8.85E-119 | -0.209 | 0.272 | 0.436 | 1 | 4.60E-68  | -0.164 |
| CACT | 0.255 | 0.239 | 0 | 0.9999999 | 0.016  | 0.408 | 0.343 | 1 | 7.45E-09  | 0.065  |
| CAGA | 0.378 | 0.265 | 1 | 2.80E-36  | 0.113  | 0.508 | 0.352 | 1 | 1.28E-44  | 0.157  |
| CAGC | 0.773 | 0.46  | 1 | 3.91E-99  | 0.312  | 0.671 | 0.436 | 1 | 2.06E-74  | 0.235  |
| CAGG | 0.647 | 0.553 | 1 | 8.66E-07  | 0.094  | 0.739 | 0.434 | 1 | 3.29E-145 | 0.306  |
| CAGT | 0.336 | 0.287 | 1 | 1.13E-09  | 0.048  | 0.366 | 0.313 | 1 | 1.35E-07  | 0.053  |
| CATA | 0.058 | 0.146 | 1 | 6.68E-26  | -0.088 | 0.17  | 0.311 | 1 | 9.09E-65  | -0.142 |
| CATC | 0.184 | 0.246 | 1 | 3.29E-14  | -0.062 | 0.281 | 0.337 | 1 | 3.63E-10  | -0.056 |
| CATG | 0.24  | 0.276 | 1 | 0.0086397 | -0.035 | 0.237 | 0.313 | 1 | 1.02E-20  | -0.076 |
| CATT | 0.163 | 0.168 | 0 | 1         | -0.006 | 0.309 | 0.304 | 0 | 1         | 0.005  |
| CCAA | 0.229 | 0.215 | 0 | 0.9974366 | 0.014  | 0.438 | 0.368 | 1 | 1.76E-08  | 0.069  |
| CCAC | 0.359 | 0.44  | 1 | 6.23E-19  | -0.081 | 0.56  | 0.492 | 1 | 4.57E-08  | 0.069  |
| CCAG | 0.631 | 0.461 | 1 | 2.75E-33  | 0.170  | 0.738 | 0.437 | 1 | 1.72E-127 | 0.301  |
| CCAT | 0.237 | 0.239 | 0 | 0.8971656 | -0.002 | 0.282 | 0.342 | 1 | 4.49E-09  | -0.060 |
| CCCA | 0.458 | 0.431 | 0 | 0.7678608 | 0.026  | 0.691 | 0.494 | 1 | 4.91E-55  | 0.197  |
| CCCC | 0.804 | 1.097 | 1 | 4.34E-18  | -0.294 | 0.855 | 0.912 | 1 | 0.046896  | -0.058 |
| CCCG | 0.922 | 1.035 | 1 | 5.00E-24  | -0.112 | 0.681 | 0.724 | 1 | 1.36E-05  | -0.043 |
| CCCT | 0.562 | 0.532 | 0 | 0.9997722 | 0.029  | 0.625 | 0.507 | 1 | 1.60E-18  | 0.117  |
| CCGA | 0.365 | 0.464 | 1 | 4.46E-27  | -0.099 | 0.268 | 0.437 | 1 | 5.57E-66  | -0.168 |
| CCGC | 1.272 | 1.053 | 1 | 1.66E-08  | 0.218  | 0.688 | 0.726 | 1 | 1.88E-16  | -0.038 |
| CCGG | 1.149 | 1.115 | 0 | 0.5744381 | 0.034  | 0.563 | 0.657 | 1 | 1.09E-12  | -0.094 |
| CCGT | 0.311 | 0.558 | 1 | 2.69E-120 | -0.247 | 0.223 | 0.42  | 1 | 9.11E-95  | -0.197 |
| CCTA | 0.157 | 0.244 | 1 | 1.84E-24  | -0.087 | 0.278 | 0.346 | 1 | 1.28E-11  | -0.068 |
| CCTC | 0.742 | 0.55  | 1 | 6.96E-24  | 0.191  | 0.783 | 0.5   | 1 | 5.24E-73  | 0.282  |
| CCTG | 0.681 | 0.53  | 1 | 4.93E-22  | 0.151  | 0.669 | 0.422 | 1 | 8.70E-108 | 0.247  |
| CCTT | 0.372 | 0.326 | 1 | 0.0005468 | 0.047  | 0.458 | 0.363 | 1 | 3.77E-12  | 0.095  |
| CGAA | 0.172 | 0.265 | 1 | 3.66E-21  | -0.093 | 0.199 | 0.353 | 1 | 1.54E-67  | -0.154 |
| CGAC | 0.258 | 0.471 | 1 | 9.18E-108 | -0.213 | 0.196 | 0.437 | 1 | 8.90E-147 | -0.242 |
| CGAG | 0.525 | 0.555 | 1 | 5.47E-05  | -0.029 | 0.333 | 0.432 | 1 | 7.06E-30  | -0.098 |
| CGAT | 0.11  | 0.267 | 1 | 4.32E-87  | -0.157 | 0.114 | 0.314 | 1 | 2.74E-132 | -0.201 |
| CGCA | 0.455 | 0.486 | 1 | 0.0005802 | -0.031 | 0.308 | 0.434 | 1 | 5.52E-48  | -0.127 |
| CGCC | 1.142 | 1.048 | 1 | 0.0076493 | 0.094  | 0.692 | 0.722 | 1 | 2.10E-06  | -0.030 |
| CGCG | 1.098 | 1.104 | 1 | 1.59E-19  | -0.006 | 0.451 | 0.655 | 1 | 6.07E-72  | -0.205 |
| CGCT | 0.638 | 0.537 | 1 | 3.54E-06  | 0.101  | 0.326 | 0.421 | 1 | 4.87E-24  | -0.094 |
| CGGA | 0.652 | 0.554 | 1 | 3.91E-09  | 0.098  | 0.321 | 0.428 | 1 | 2.12E-30  | -0.107 |
| CGGC | 1.425 | 1.117 | 1 | 2.04E-18  | 0.308  | 0.527 | 0.657 | 1 | 7.79E-39  | -0.129 |
| CGGG | 1.205 | 1.358 | 1 | 1.19E-22  | -0.153 | 0.596 | 0.671 | 1 | 4.35E-10  | -0.075 |
| CGGT | 0.47  | 0.61  | 1 | 1.20E-50  | -0.140 | 0.202 | 0.393 | 1 | 4.06E-98  | -0.191 |
| CGTA | 0.108 | 0.27  | 1 | 7.41E-88  | -0.162 | 0.088 | 0.316 | 1 | 1.31E-173 | -0.227 |
| CGTC | 0.371 | 0.551 | 1 | 1.12E-70  | -0.180 | 0.234 | 0.425 | 1 | 1.66E-89  | -0.191 |
| CGTG | 0.387 | 0.613 | 1 | 1.71E-117 | -0.226 | 0.259 | 0.398 | 1 | 1.08E-48  | -0.138 |



|      |       |       |   |           |        |       |       |   |           |        |
|------|-------|-------|---|-----------|--------|-------|-------|---|-----------|--------|
| CGTT | 0.211 | 0.333 | 1 | 9.28E-44  | -0.123 | 0.155 | 0.319 | 1 | 1.12E-80  | -0.163 |
| CTAA | 0.107 | 0.144 | 1 | 2.93E-05  | -0.037 | 0.28  | 0.316 | 1 | 0.001088  | -0.037 |
| CTAC | 0.161 | 0.253 | 1 | 2.34E-23  | -0.092 | 0.245 | 0.341 | 1 | 9.69E-24  | -0.096 |
| CTAG | 0.22  | 0.269 | 1 | 1.45E-08  | -0.049 | 0.259 | 0.317 | 1 | 1.62E-09  | -0.058 |
| CTAT | 0.085 | 0.173 | 1 | 7.33E-24  | -0.087 | 0.171 | 0.306 | 1 | 4.13E-57  | -0.135 |
| CTCA | 0.287 | 0.245 | 1 | 0.0001026 | 0.042  | 0.479 | 0.34  | 1 | 6.58E-38  | 0.140  |
| CTCC | 0.853 | 0.539 | 1 | 1.31E-74  | 0.314  | 0.852 | 0.498 | 1 | 1.52E-125 | 0.354  |
| CTCG | 0.503 | 0.53  | 1 | 7.25E-08  | -0.027 | 0.344 | 0.422 | 1 | 1.59E-19  | -0.078 |
| CTCT | 0.513 | 0.33  | 1 | 1.60E-59  | 0.183  | 0.548 | 0.359 | 1 | 5.59E-59  | 0.189  |
| CTGA | 0.397 | 0.268 | 1 | 2.98E-36  | 0.129  | 0.438 | 0.312 | 1 | 2.55E-36  | 0.126  |
| CTGC | 0.897 | 0.529 | 1 | 6.68E-104 | 0.368  | 0.603 | 0.423 | 1 | 1.31E-47  | 0.181  |
| CTGG | 0.829 | 0.604 | 1 | 3.23E-40  | 0.225  | 0.695 | 0.399 | 1 | 1.78E-141 | 0.296  |
| CTGT | 0.427 | 0.328 | 1 | 3.40E-13  | 0.099  | 0.393 | 0.315 | 1 | 1.26E-11  | 0.078  |
| CTTA | 0.116 | 0.17  | 1 | 4.88E-07  | -0.054 | 0.231 | 0.308 | 1 | 1.56E-15  | -0.077 |
| CTTC | 0.543 | 0.322 | 1 | 1.37E-85  | 0.221  | 0.489 | 0.359 | 1 | 6.01E-27  | 0.129  |
| CTTG | 0.307 | 0.338 | 1 | 0.014088  | -0.031 | 0.358 | 0.317 | 1 | 0.000418  | 0.041  |
| CTTT | 0.351 | 0.229 | 1 | 1.59E-36  | 0.122  | 0.477 | 0.334 | 1 | 1.47E-37  | 0.143  |
| GAAA | 0.288 | 0.185 | 1 | 4.07E-37  | 0.103  | 0.552 | 0.383 | 1 | 9.92E-43  | 0.169  |
| GAAC | 0.229 | 0.265 | 0 | 0.0667583 | -0.036 | 0.314 | 0.349 | 1 | 0.040134  | -0.035 |
| GAAG | 0.568 | 0.331 | 1 | 1.67E-111 | 0.237  | 0.489 | 0.383 | 1 | 1.39E-19  | 0.106  |
| GAAT | 0.131 | 0.172 | 1 | 1.41E-05  | -0.041 | 0.277 | 0.309 | 1 | 0.004406  | -0.032 |
| GACA | 0.209 | 0.263 | 1 | 4.03E-07  | -0.054 | 0.311 | 0.346 | 1 | 0.008365  | -0.035 |
| GACC | 0.359 | 0.474 | 1 | 1.36E-29  | -0.116 | 0.343 | 0.44  | 1 | 6.14E-22  | -0.097 |
| GACG | 0.382 | 0.558 | 1 | 3.39E-57  | -0.175 | 0.228 | 0.431 | 1 | 2.58E-100 | -0.202 |
| GACT | 0.288 | 0.266 | 0 | 0.9109212 | 0.022  | 0.31  | 0.318 | 0 | 0.295203  | -0.008 |
| GAGA | 0.477 | 0.34  | 1 | 1.85E-34  | 0.137  | 0.557 | 0.381 | 1 | 3.74E-42  | 0.176  |
| GAGC | 0.83  | 0.555 | 1 | 3.11E-62  | 0.276  | 0.508 | 0.431 | 1 | 4.01E-08  | 0.077  |
| GAGG | 1.013 | 0.736 | 1 | 4.92E-51  | 0.277  | 0.758 | 0.484 | 1 | 5.95E-70  | 0.274  |
| GAGT | 0.401 | 0.336 | 1 | 3.24E-10  | 0.065  | 0.327 | 0.32  | 0 | 0.999997  | 0.007  |
| GATA | 0.072 | 0.175 | 1 | 1.51E-31  | -0.103 | 0.153 | 0.309 | 1 | 6.62E-71  | -0.156 |
| GATC | 0.17  | 0.27  | 1 | 6.07E-34  | -0.100 | 0.248 | 0.328 | 1 | 1.23E-20  | -0.080 |
| GATG | 0.258 | 0.331 | 1 | 4.58E-14  | -0.073 | 0.246 | 0.319 | 1 | 7.05E-18  | -0.073 |
| GATT | 0.153 | 0.189 | 1 | 0.0006216 | -0.036 | 0.258 | 0.291 | 1 | 0.002102  | -0.032 |
| GCAA | 0.232 | 0.272 | 0 | 0.0836628 | -0.040 | 0.333 | 0.351 | 0 | 0.264289  | -0.018 |
| GCAC | 0.315 | 0.466 | 1 | 9.53E-58  | -0.151 | 0.372 | 0.434 | 1 | 2.49E-10  | -0.063 |
| GCAG | 0.87  | 0.564 | 1 | 1.74E-93  | 0.306  | 0.645 | 0.432 | 1 | 6.02E-62  | 0.213  |
| GCAT | 0.167 | 0.275 | 1 | 1.96E-37  | -0.108 | 0.228 | 0.311 | 1 | 8.11E-24  | -0.083 |
| GCCA | 0.518 | 0.465 | 1 | 2.67E-05  | 0.054  | 0.514 | 0.436 | 1 | 1.54E-13  | 0.078  |
| GCCC | 0.938 | 1.018 | 1 | 7.28E-22  | -0.080 | 0.803 | 0.723 | 1 | 3.81E-05  | 0.080  |
| GCCG | 1.287 | 1.149 | 1 | 2.35E-05  | 0.139  | 0.5   | 0.658 | 1 | 3.07E-46  | -0.158 |
| GCCT | 0.64  | 0.551 | 1 | 2.55E-08  | 0.090  | 0.626 | 0.42  | 1 | 2.46E-65  | 0.206  |

|      |       |       |   |           |        |       |       |   |           |        |
|------|-------|-------|---|-----------|--------|-------|-------|---|-----------|--------|
| GCGA | 0.455 | 0.55  | 1 | 3.59E-24  | -0.095 | 0.278 | 0.433 | 1 | 1.90E-67  | -0.155 |
| GCGC | 1.258 | 1.107 | 1 | 5.72E-05  | 0.151  | 0.573 | 0.652 | 1 | 5.03E-15  | -0.079 |
| GCGG | 1.821 | 1.356 | 1 | 7.17E-36  | 0.465  | 0.588 | 0.673 | 1 | 2.63E-26  | -0.085 |
| GCGT | 0.433 | 0.601 | 1 | 1.21E-76  | -0.168 | 0.23  | 0.4   | 1 | 7.29E-77  | -0.170 |
| GCTA | 0.197 | 0.275 | 1 | 5.66E-18  | -0.077 | 0.235 | 0.318 | 1 | 6.70E-23  | -0.083 |
| GCTC | 0.721 | 0.516 | 1 | 7.06E-32  | 0.205  | 0.511 | 0.416 | 1 | 1.01E-13  | 0.095  |
| GCTG | 1.104 | 0.595 | 1 | 2.50E-150 | 0.509  | 0.615 | 0.395 | 1 | 4.38E-78  | 0.220  |
| GCTT | 0.434 | 0.335 | 1 | 1.22E-22  | 0.099  | 0.37  | 0.318 | 1 | 1.30E-06  | 0.053  |
| GGAA | 0.546 | 0.339 | 1 | 5.79E-87  | 0.207  | 0.545 | 0.381 | 1 | 2.42E-51  | 0.164  |
| GGAC | 0.474 | 0.56  | 1 | 1.05E-12  | -0.086 | 0.384 | 0.428 | 1 | 4.94E-05  | -0.044 |
| GGAG | 1.156 | 0.727 | 1 | 2.03E-117 | 0.429  | 0.767 | 0.483 | 1 | 1.03E-75  | 0.285  |
| GGAT | 0.225 | 0.324 | 1 | 1.03E-28  | -0.099 | 0.298 | 0.318 | 0 | 0.387432  | -0.020 |
| GGCA | 0.496 | 0.555 | 1 | 5.68E-08  | -0.059 | 0.464 | 0.43  | 1 | 0.004637  | 0.035  |
| GGCC | 1.118 | 1.133 | 1 | 0.0042573 | -0.014 | 0.71  | 0.656 | 1 | 0.000292  | 0.055  |
| GGCG | 1.645 | 1.349 | 1 | 1.06E-11  | 0.295  | 0.615 | 0.673 | 1 | 3.35E-10  | -0.058 |
| GGCT | 0.87  | 0.595 | 1 | 2.56E-65  | 0.275  | 0.574 | 0.394 | 1 | 8.19E-56  | 0.180  |
| GGGA | 0.807 | 0.727 | 1 | 2.72E-12  | 0.081  | 0.704 | 0.479 | 1 | 2.00E-76  | 0.225  |
| GGGC | 1.24  | 1.349 | 1 | 1.61E-17  | -0.109 | 0.744 | 0.669 | 1 | 1.62E-07  | 0.075  |
| GGGG | 1.148 | 1.801 | 1 | 2.86E-68  | -0.654 | 0.8   | 0.785 | 1 | 1.18E-07  | 0.015  |
| GGGT | 0.548 | 0.784 | 1 | 1.25E-62  | -0.236 | 0.434 | 0.427 | 0 | 1         | 0.007  |
| GGTA | 0.208 | 0.343 | 1 | 2.64E-40  | -0.134 | 0.189 | 0.326 | 1 | 1.06E-54  | -0.137 |
| GGTC | 0.449 | 0.605 | 1 | 6.23E-56  | -0.156 | 0.36  | 0.4   | 1 | 0.000185  | -0.041 |
| GGTG | 0.694 | 0.763 | 1 | 1.54E-07  | -0.069 | 0.447 | 0.423 | 0 | 0.19287   | 0.024  |
| GGTT | 0.361 | 0.398 | 1 | 0.0185169 | -0.037 | 0.318 | 0.31  | 0 | 0.598857  | 0.008  |
| GTAA | 0.147 | 0.172 | 0 | 0.3036719 | -0.024 | 0.225 | 0.314 | 1 | 3.57E-21  | -0.089 |
| GTAC | 0.11  | 0.272 | 1 | 1.04E-88  | -0.162 | 0.141 | 0.318 | 1 | 2.92E-102 | -0.177 |
| GTAG | 0.228 | 0.337 | 1 | 6.87E-27  | -0.109 | 0.223 | 0.324 | 1 | 1.86E-26  | -0.101 |
| GTAT | 0.071 | 0.19  | 1 | 4.65E-45  | -0.119 | 0.161 | 0.289 | 1 | 2.51E-47  | -0.127 |
| GTCA | 0.245 | 0.281 | 1 | 0.0002985 | -0.036 | 0.268 | 0.314 | 1 | 7.68E-08  | -0.046 |
| GTCC | 0.469 | 0.535 | 1 | 6.93E-15  | -0.066 | 0.39  | 0.427 | 1 | 0.004482  | -0.037 |
| GTCG | 0.378 | 0.612 | 1 | 1.29E-117 | -0.234 | 0.169 | 0.397 | 1 | 2.37E-138 | -0.229 |
| GTCT | 0.359 | 0.337 | 0 | 0.3857596 | 0.022  | 0.354 | 0.314 | 1 | 3.13E-05  | 0.040  |
| GTGA | 0.398 | 0.339 | 1 | 3.69E-10  | 0.059  | 0.358 | 0.324 | 1 | 0.003059  | 0.034  |
| GTGC | 0.456 | 0.605 | 1 | 2.25E-56  | -0.148 | 0.342 | 0.399 | 1 | 4.57E-08  | -0.057 |
| GTGG | 0.701 | 0.775 | 1 | 2.71E-07  | -0.074 | 0.454 | 0.421 | 0 | 0.214065  | 0.033  |
| GTGT | 0.335 | 0.397 | 1 | 1.56E-11  | -0.062 | 0.299 | 0.31  | 1 | 4.72E-06  | -0.010 |
| GTTA | 0.124 | 0.196 | 1 | 4.00E-14  | -0.071 | 0.187 | 0.291 | 1 | 7.51E-34  | -0.104 |
| GTTC | 0.313 | 0.346 | 0 | 0.1486678 | -0.033 | 0.28  | 0.319 | 1 | 0.005446  | -0.039 |
| GTTG | 0.337 | 0.393 | 1 | 9.94E-09  | -0.056 | 0.249 | 0.309 | 1 | 4.85E-09  | -0.059 |
| GTTT | 0.31  | 0.248 | 1 | 6.93E-15  | 0.062  | 0.39  | 0.306 | 1 | 9.72E-15  | 0.084  |
| TAAA | 0.134 | 0.107 | 1 | 0.0003774 | 0.027  | 0.436 | 0.371 | 1 | 0.000134  | 0.065  |

|      |       |       |   |           |        |       |       |   |           |        |
|------|-------|-------|---|-----------|--------|-------|-------|---|-----------|--------|
| TAAC | 0.093 | 0.145 | 1 | 6.64E-10  | -0.052 | 0.21  | 0.314 | 1 | 1.13E-31  | -0.103 |
| TAAG | 0.15  | 0.172 | 0 | 0.3791144 | -0.022 | 0.242 | 0.312 | 1 | 8.02E-14  | -0.070 |
| TAAT | 0.062 | 0.121 | 1 | 1.78E-08  | -0.059 | 0.255 | 0.346 | 1 | 1.23E-14  | -0.091 |
| TACA | 0.083 | 0.149 | 1 | 1.79E-13  | -0.066 | 0.275 | 0.313 | 1 | 4.94E-05  | -0.038 |
| TACC | 0.134 | 0.244 | 1 | 4.38E-41  | -0.110 | 0.185 | 0.346 | 1 | 6.65E-75  | -0.161 |
| TACG | 0.103 | 0.278 | 1 | 8.84E-98  | -0.174 | 0.096 | 0.313 | 1 | 1.22E-153 | -0.217 |
| TACT | 0.111 | 0.174 | 1 | 1.53E-09  | -0.063 | 0.227 | 0.305 | 1 | 1.49E-15  | -0.077 |
| TAGA | 0.125 | 0.179 | 1 | 3.36E-05  | -0.054 | 0.227 | 0.313 | 1 | 7.98E-19  | -0.086 |
| TAGC | 0.192 | 0.274 | 1 | 1.05E-18  | -0.082 | 0.229 | 0.313 | 1 | 1.23E-19  | -0.084 |
| TAGG | 0.223 | 0.337 | 1 | 6.85E-32  | -0.114 | 0.253 | 0.322 | 1 | 2.98E-13  | -0.069 |
| TAGT | 0.123 | 0.189 | 1 | 1.73E-12  | -0.066 | 0.185 | 0.292 | 1 | 1.80E-29  | -0.107 |
| TATA | 0.051 | 0.123 | 1 | 3.97E-12  | -0.071 | 0.177 | 0.34  | 1 | 1.75E-62  | -0.164 |
| TATC | 0.078 | 0.171 | 1 | 3.04E-28  | -0.093 | 0.157 | 0.304 | 1 | 1.94E-63  | -0.147 |
| TATG | 0.081 | 0.192 | 1 | 2.06E-38  | -0.111 | 0.168 | 0.29  | 1 | 8.52E-48  | -0.122 |
| TATT | 0.096 | 0.139 | 1 | 2.52E-05  | -0.044 | 0.316 | 0.343 | 1 | 0.007712  | -0.027 |
| TCAA | 0.123 | 0.148 | 1 | 0.0255913 | -0.026 | 0.299 | 0.311 | 0 | 0.940762  | -0.012 |
| TCAC | 0.22  | 0.251 | 1 | 0.0015397 | -0.031 | 0.362 | 0.342 | 0 | 0.476476  | 0.020  |
| TCAG | 0.354 | 0.276 | 1 | 8.59E-16  | 0.079  | 0.445 | 0.314 | 1 | 6.17E-38  | 0.131  |
| TCAT | 0.126 | 0.173 | 1 | 2.65E-06  | -0.047 | 0.246 | 0.303 | 1 | 5.68E-11  | -0.057 |
| TCCA | 0.297 | 0.235 | 1 | 1.85E-06  | 0.062  | 0.479 | 0.34  | 1 | 6.99E-41  | 0.138  |
| TCCC | 0.675 | 0.549 | 1 | 6.01E-14  | 0.126  | 0.743 | 0.507 | 1 | 8.75E-77  | 0.237  |
| TCCG | 0.608 | 0.531 | 1 | 0.0037732 | 0.077  | 0.32  | 0.421 | 1 | 1.12E-28  | -0.101 |
| TCCT | 0.517 | 0.319 | 1 | 1.25E-58  | 0.198  | 0.571 | 0.361 | 1 | 9.18E-78  | 0.210  |
| TCGA | 0.123 | 0.283 | 1 | 2.94E-75  | -0.160 | 0.143 | 0.312 | 1 | 3.94E-90  | -0.170 |
| TCGC | 0.469 | 0.546 | 1 | 6.60E-18  | -0.077 | 0.271 | 0.422 | 1 | 1.42E-57  | -0.151 |
| TCGG | 0.483 | 0.607 | 1 | 2.00E-35  | -0.124 | 0.272 | 0.395 | 1 | 2.25E-36  | -0.123 |
| TCGT | 0.165 | 0.334 | 1 | 2.06E-80  | -0.169 | 0.129 | 0.319 | 1 | 4.53E-108 | -0.189 |
| TCTA | 0.132 | 0.174 | 1 | 0.0001156 | -0.041 | 0.241 | 0.305 | 1 | 5.59E-11  | -0.064 |
| TCTC | 0.463 | 0.332 | 1 | 1.95E-30  | 0.130  | 0.546 | 0.362 | 1 | 1.26E-59  | 0.185  |
| TCTG | 0.477 | 0.339 | 1 | 1.23E-38  | 0.138  | 0.462 | 0.313 | 1 | 8.20E-47  | 0.150  |
| TCTT | 0.318 | 0.227 | 1 | 3.75E-21  | 0.091  | 0.409 | 0.333 | 1 | 2.06E-14  | 0.076  |
| TGAA | 0.208 | 0.168 | 1 | 0.0001207 | 0.040  | 0.371 | 0.309 | 1 | 3.05E-09  | 0.062  |
| TGAC | 0.245 | 0.276 | 1 | 0.0058242 | -0.031 | 0.262 | 0.315 | 1 | 3.09E-09  | -0.052 |
| TGAG | 0.513 | 0.341 | 1 | 1.85E-69  | 0.172  | 0.462 | 0.323 | 1 | 2.20E-38  | 0.139  |
| TGAT | 0.128 | 0.187 | 1 | 4.58E-14  | -0.059 | 0.2   | 0.292 | 1 | 2.15E-24  | -0.092 |
| TGCA | 0.297 | 0.276 | 0 | 0.1071655 | 0.020  | 0.394 | 0.314 | 1 | 7.11E-09  | 0.080  |
| TGCC | 0.481 | 0.537 | 1 | 1.98E-08  | -0.056 | 0.433 | 0.424 | 0 | 0.857022  | 0.009  |
| TGCG | 0.562 | 0.611 | 1 | 1.24E-16  | -0.050 | 0.262 | 0.397 | 1 | 8.41E-57  | -0.135 |
| TGCT | 0.478 | 0.321 | 1 | 1.46E-26  | 0.157  | 0.383 | 0.317 | 1 | 7.33E-09  | 0.065  |
| TGGA | 0.419 | 0.331 | 1 | 1.63E-16  | 0.088  | 0.393 | 0.321 | 1 | 5.48E-09  | 0.072  |
| TGGC | 0.755 | 0.613 | 1 | 1.48E-17  | 0.142  | 0.443 | 0.395 | 1 | 0.00061   | 0.047  |

|      |       |       |   |           |        |       |       |   |          |        |
|------|-------|-------|---|-----------|--------|-------|-------|---|----------|--------|
| TGGG | 0.717 | 0.764 | 1 | 5.98E-05  | -0.048 | 0.637 | 0.42  | 1 | 6.99E-81 | 0.217  |
| TGGT | 0.344 | 0.384 | 1 | 1.17E-05  | -0.039 | 0.308 | 0.313 | 0 | 0.981663 | -0.006 |
| TGTA | 0.123 | 0.192 | 1 | 1.28E-14  | -0.069 | 0.237 | 0.289 | 1 | 1.14E-07 | -0.052 |
| TGTC | 0.318 | 0.327 | 0 | 0.064245  | -0.009 | 0.285 | 0.314 | 1 | 8.57E-04 | -0.028 |
| TGTG | 0.424 | 0.397 | 0 | 0.5423292 | 0.027  | 0.367 | 0.311 | 0 | 0.155412 | 0.057  |
| TGTT | 0.258 | 0.253 | 0 | 0.2910308 | 0.005  | 0.319 | 0.305 | 0 | 0.999772 | 0.014  |
| TTAA | 0.097 | 0.118 | 0 | 0.2924167 | -0.021 | 0.355 | 0.339 | 0 | 0.850337 | 0.016  |
| TTAC | 0.112 | 0.171 | 1 | 9.30E-10  | -0.059 | 0.235 | 0.308 | 1 | 8.66E-14 | -0.073 |
| TTAG | 0.139 | 0.193 | 1 | 5.08E-07  | -0.054 | 0.25  | 0.289 | 1 | 0.000541 | -0.040 |
| TTAT | 0.085 | 0.146 | 1 | 2.57E-07  | -0.060 | 0.275 | 0.343 | 1 | 1.08E-11 | -0.069 |
| TTCA | 0.192 | 0.171 | 0 | 0.0720371 | 0.021  | 0.376 | 0.305 | 1 | 9.29E-11 | 0.071  |
| TTCC | 0.584 | 0.321 | 1 | 5.96E-127 | 0.263  | 0.552 | 0.363 | 1 | 7.51E-58 | 0.190  |
| TTCG | 0.25  | 0.353 | 1 | 1.51E-21  | -0.103 | 0.171 | 0.316 | 1 | 5.25E-63 | -0.145 |
| TTCT | 0.364 | 0.236 | 1 | 1.74E-50  | 0.129  | 0.477 | 0.333 | 1 | 4.58E-42 | 0.144  |
| TTGA | 0.178 | 0.192 | 0 | 0.7541037 | -0.014 | 0.259 | 0.29  | 1 | 0.01464  | -0.031 |
| TTGC | 0.306 | 0.333 | 1 | 0.0036129 | -0.027 | 0.307 | 0.317 | 0 | 0.351682 | -0.010 |
| TTGG | 0.373 | 0.388 | 0 | 0.2655821 | -0.015 | 0.36  | 0.313 | 1 | 8.07E-05 | 0.047  |
| TTGT | 0.236 | 0.247 | 0 | 1         | -0.012 | 0.284 | 0.305 | 0 | 0.065911 | -0.022 |
| TTTA | 0.128 | 0.147 | 0 | 0.9905053 | -0.019 | 0.413 | 0.345 | 1 | 3.33E-07 | 0.068  |
| TTTC | 0.399 | 0.232 | 1 | 5.11E-67  | 0.168  | 0.533 | 0.335 | 1 | 1.12E-72 | 0.198  |
| TTTG | 0.306 | 0.242 | 1 | 1.93E-12  | 0.064  | 0.403 | 0.305 | 1 | 1.04E-17 | 0.098  |
| TTTT | 0.357 | 0.198 | 1 | 2.61E-22  | 0.159  | 0.784 | 0.393 | 1 | 9.00E-61 | 0.392  |

**TABLE S3** This table is complementary to Fig. S6 of Supplemental Information. It provides the two-sample Kolmogorov–Smirnov  $p$ -values for the statistical significance of the enrichment levels for all 256 nucleotide quadruplets. Quadruplets colored in yellow did not show significant enrichment or depletion at [0;100], quadruplets colored in blue did not show significant enrichment or depletion at [-450;-350], quadruplets colored in green did not show significant enrichment or depletion at both [0;100] and [-450;-350]. In particular, in the interval [0;100], 215 out of 256 quadruplets showed a significant enrichment/depletion. In the interval [-450; -350], 225 out of 256 quadruplets showed a significant enrichment/depletion.
